# Supplementary material for: Cleaner and stronger: how 8-quinolinolate facilitates formation of Co(iii)–thiolate from Co(ii)–disulfide complexes
Source: Royal Society of Chemistry journal article supplement (doi:10.1039/d2dt02106d), 2022-01-01
Supplement: d2dt02106d1.pdf [file d2dt02106d1.pdf]

## Supplementary Information for

# Cleaner and Stronger: How 8-Quinolinolate Facilitates Formation of Co(III)-thiolate from Co(II)-disulfide Complexes

*Christian Marvelous,<sup>†</sup> Lucas de Azevedo Santos,<sup>‡</sup> Maxime A. Siegler,<sup>‡</sup> Célia Fonseca Guerra,<sup>†, §, \*</sup>  
and Elisabeth Bouwman<sup>†\*</sup>*

<sup>†</sup> Leiden Institute of Chemistry, Gorlaeus Laboratories, Leiden University, P.O. Box 9502, 2300  
RA Leiden, The Netherlands

<sup>‡</sup> Department of Chemistry, Johns Hopkins University, 3400 N. Charles Street, Baltimore,  
Maryland 21218, United States

<sup>§</sup> Department of Theoretical Chemistry, Amsterdam Institute for Molecular and Life Sciences  
(AIMMS), Amsterdam Center for Multiscale Modeling (ACMM), Vrije Universiteit Amsterdam,  
De Boelelaan 1083, 1081 HV Amsterdam, The Netherlands

Corresponding authors: [c.fonsecaguerra@vu.nl](mailto:c.fonsecaguerra@vu.nl) / [bouwman@lic.leidenuniv.nl](mailto:bouwman@lic.leidenuniv.nl)

## Table of Contents

|                                                                                                                                                                                                                                                         |   |
|---------------------------------------------------------------------------------------------------------------------------------------------------------------------------------------------------------------------------------------------------------|---|
| <b>Figure S1.</b> ESI–MS spectrum of a) compound [2 <sub>SS</sub> ] dissolved in methanol b) the experimental isotopic distribution of the main signal; c) simulated isotopic distribution. ....                                                        | 4 |
| <b>Figure S2.</b> <sup>1</sup> H-NMR spectrum of compound [2 <sub>SS</sub> ] dissolved in CD <sub>3</sub> CN. ....                                                                                                                                      | 4 |
| <b>Figure S3.</b> ESI–MS spectrum of a) [1 <sub>S</sub> ]Cl dissolved in methanol; b) the experimental isotopic distribution of the main signal; c) simulated isotopic distribution.....                                                                | 5 |
| <b>Figure S4.</b> ESI–MS spectrum of a) [2 <sub>S</sub> ]Cl dissolved in acetonitrile; b) the experimental isotopic distribution of the main signal; c) simulated isotopic distribution. ....                                                           | 5 |
| <b>Figure S5.</b> <sup>1</sup> H-NMR spectrum of [1 <sub>S</sub> ]Cl dissolved in CD <sub>3</sub> CN.....                                                                                                                                               | 6 |
| <b>Figure S6.</b> <sup>1</sup> H– <sup>1</sup> H-COSY NMR spectrum of [1 <sub>S</sub> ]Cl dissolved in CD <sub>3</sub> CN.....                                                                                                                          | 6 |
| <b>Figure S7.</b> <sup>1</sup> H– <sup>1</sup> H-COSY NMR spectrum of [1 <sub>S</sub> ]Cl dissolved in CD <sub>3</sub> CN. The spectrum shows the correlation of protons in N-CH <sub>2</sub> -CH <sub>2</sub> -S (3.2–3.4 ppm and 1.84–1.87 ppm). .... | 7 |
| <b>Figure S8.</b> <sup>1</sup> H-NMR spectrum of [2 <sub>S</sub> ]Cl dissolved in CD <sub>3</sub> CN.....                                                                                                                                               | 7 |

|                                                                                                                                                                                                                                                                                                                                                                                                                    |    |
|--------------------------------------------------------------------------------------------------------------------------------------------------------------------------------------------------------------------------------------------------------------------------------------------------------------------------------------------------------------------------------------------------------------------|----|
| <b>Figure S9.</b> $^1\text{H}$ - $^1\text{H}$ -COSY NMR spectrum of $[\mathbf{2}_\text{S}]\text{Cl}$ dissolved in $\text{CD}_3\text{CN}$ .....                                                                                                                                                                                                                                                                     | 8  |
| <b>Figure S10.</b> $^1\text{H}$ - $^1\text{H}$ -COSY NMR spectrum of $[\mathbf{2}_\text{S}]\text{Cl}$ dissolved in $\text{CD}_3\text{CN}$ . The spectrum shows the correlation of protons in $\text{N-CH}_2\text{-CH}_2\text{-S}$ (3.18–3.50 ppm) with the solvent peak (1.9 ppm), indicating that the solvent peak obscures the proton peak of interest. ....                                                     | 8  |
| <b>Figure S11.</b> $^1\text{H}$ -NMR spectrum of $[\mathbf{1}_\text{S}]\text{Cl}$ dissolved in $\text{CD}_3\text{CN}$ . The synthesis was done in absence of triethylamine.....                                                                                                                                                                                                                                    | 9  |
| <b>Figure S12.</b> $^1\text{H}$ - $^1\text{H}$ -COSY NMR spectrum of $[\mathbf{1}_\text{S}]\text{Cl}$ dissolved in $\text{CD}_3\text{CN}$ . The synthesis was done in absence of triethylamine.....                                                                                                                                                                                                                | 9  |
| <b>Figure S13.</b> $^1\text{H}$ - $^1\text{H}$ -COSY NMR spectrum of $[\mathbf{1}_\text{S}]\text{Cl}$ dissolved in $\text{CD}_3\text{CN}$ . The synthesis was done in absence of triethylamine. The spectrum shows the correlation of protons in $\text{N-CH}_2\text{-CH}_2\text{-S}$ (3.2–3.4 ppm and 1.84–1.87 ppm).....                                                                                         | 10 |
| <b>Figure S14.</b> $^1\text{H}$ -NMR spectrum of $[\mathbf{2}_\text{S}]\text{Cl}$ dissolved in $\text{CD}_3\text{CN}$ . The synthesis was done in absence of triethylamine.....                                                                                                                                                                                                                                    | 10 |
| <b>Figure S15.</b> $^1\text{H}$ - $^1\text{H}$ -COSY NMR spectrum of $[\mathbf{2}_\text{S}]\text{Cl}$ dissolved in $\text{CD}_3\text{CN}$ . The synthesis was done in absence of triethylamine.....                                                                                                                                                                                                                | 11 |
| <b>Figure S16.</b> $^1\text{H}$ - $^1\text{H}$ -COSY NMR spectrum of $[\mathbf{2}_\text{S}]\text{Cl}$ dissolved in $\text{CD}_3\text{CN}$ . The synthesis was done in absence of triethylamine. The spectrum shows the correlation of protons in $\text{N-CH}_2\text{-CH}_2\text{-S}$ (3.18–3.50 ppm) with the solvent peak (1.9 ppm), indicating that the solvent peak obscures the proton peak of interest. .... | 11 |
| <b>Figure S17.</b> Infrared spectra of $[\mathbf{2}_\text{S}]\text{Cl}$ (black trace) and $[\mathbf{2}_{\text{SSquin}}]$ (red trace). ....                                                                                                                                                                                                                                                                         | 12 |
| <b>Figure S18.</b> UV-visible diffuse reflectance spectrum of $[\mathbf{2}_{\text{SSquin}}]$ .....                                                                                                                                                                                                                                                                                                                 | 12 |
| <b>Figure S19.</b> ESI-MS spectrum of $[\mathbf{2}_{\text{SSquin}}]$ dissolved in methanol. ....                                                                                                                                                                                                                                                                                                                   | 13 |
| <b>Figure S20.</b> $^1\text{H}$ -NMR spectrum of $[\mathbf{2}_{\text{SSquin}}]$ dissolved in $\text{CD}_3\text{OD}$ .....                                                                                                                                                                                                                                                                                          | 13 |
| <b>Figure S21.</b> $^1\text{H}$ -NMR spectra of $[\mathbf{2}_{\text{SSquin}}]$ dissolved in $\text{CD}_3\text{OD}$ (bottom spectrum) compared to that of $[\mathbf{2}_\text{S}]\text{Cl}$ in $\text{CD}_3\text{CN}$ (top spectrum). ....                                                                                                                                                                           | 14 |
| <b>Figure S22.</b> Optimized geometries of $[\mathbf{2}_\text{S}]^+$ and $[\mathbf{2}_{\text{S,rev}}]^+$ with selected bond distances (Å).....                                                                                                                                                                                                                                                                     | 16 |
| <b>Figure S23.</b> Several frontier orbitals of $[\mathbf{1}_\text{S}]^+$ associated with Co d-orbitals along with their energies, orbital visualization, and orbital composition. ....                                                                                                                                                                                                                            | 17 |
| <b>Figure S24.</b> Several frontier orbitals of $[\mathbf{2}_\text{S}]^+$ associated with Co d-orbitals along with their energies, orbital visualization, and orbital composition. ....                                                                                                                                                                                                                            | 18 |
| <b>Figure S25.</b> Molecular orbital diagram for the interaction between the fragments $[\text{Co}(\text{L}^1\text{S})]^{2+}$ and $[\text{quin}]^-$ in $[\mathbf{1}_\text{S}]^+$ . ....                                                                                                                                                                                                                            | 19 |
| <b>Figure S26.</b> Molecular orbital diagram for the interaction between the fragments $[\text{Co}(\text{L}^1\text{S})]^{2+}$ and $[\text{quin}]^-$ in $[\mathbf{1}_{\text{S,rev}}]^+$ . ....                                                                                                                                                                                                                      | 20 |

|                                                                                                                                                              |    |
|--------------------------------------------------------------------------------------------------------------------------------------------------------------|----|
| <b>Table S1.</b> Crystallographic data in the present work. ....                                                                                             | 15 |
| <b>Table S2.</b> Coordinates of optimized structure of $[1_S]^+$ and $[1_{S,rev}]^+$ with $S = 0$ in gas phase and its respective bond energies. ....        | 21 |
| <b>Table S3.</b> Coordinates of optimized structure of $[2_S]^+$ and $[2_{S,rev}]^+$ with $S = 0$ in gas phase and its respective bond energies. ....        | 22 |
| <b>Table S4.</b> Coordinates of optimized structure of $[1_S]^+$ and $[1_{S,rev}]^+$ with $S = 0$ in methanol (COSMO) and its respective bond energies. .... | 23 |
| <b>Table S5.</b> Coordinates of optimized structure of $[2_S]^+$ and $[2_{S,rev}]^+$ with $S = 0$ in methanol (COSMO) and its respective bond energies. .... | 24 |

## Part 1 – Experimental Data

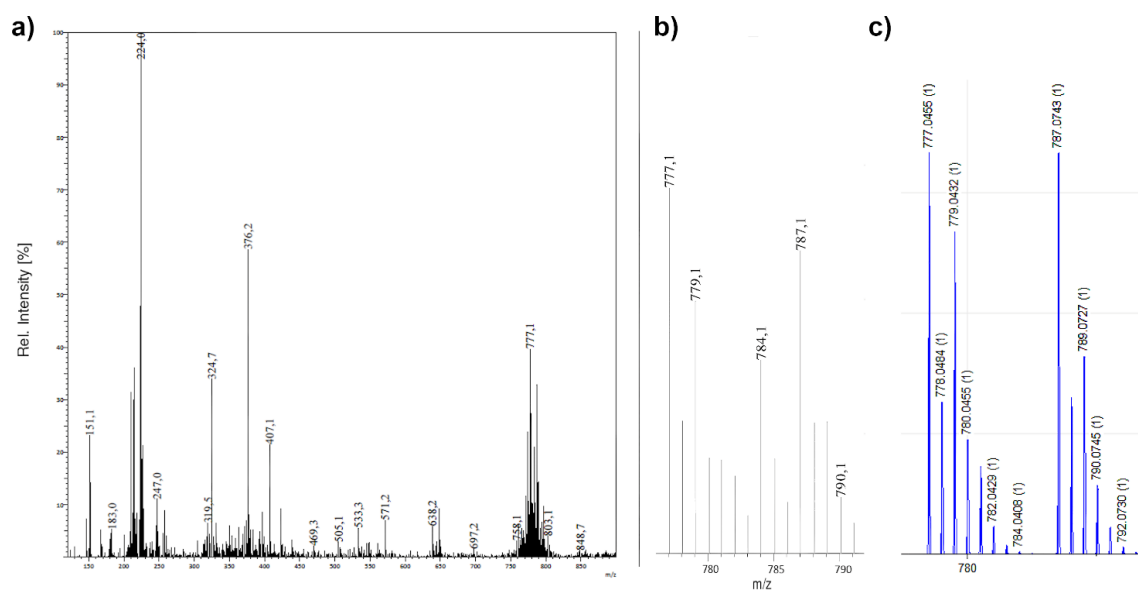

**Figure S1.** ESI-MS spectrum of a) compound [2ss] dissolved in methanol b) the experimental isotopic distribution of the main signal; c) simulated isotopic distribution. ESI-MS found (calcd.) for  $[2ss - 4Cl^- + 2HCOO^-]^{2+}$  m/z 376.2 (376.04), for  $[2ss - 2Cl^- + HCOO^-]^+$  m/z 777.1 (777.05), and for  $[2ss - 3Cl^- + 2HCOO^-]^+$  m/z 787.1 (787.07).

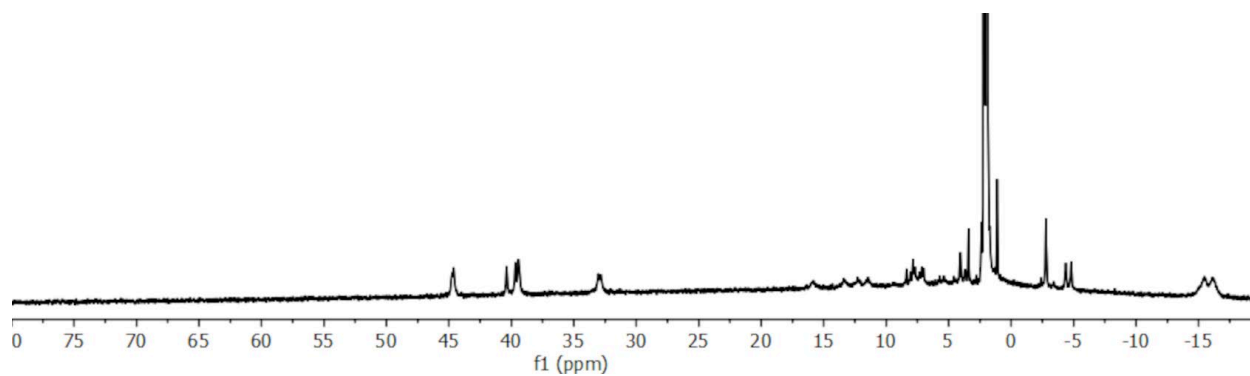

**Figure S2.**  $^1H$ -NMR spectrum of compound [2ss] dissolved in  $CD_3CN$ .

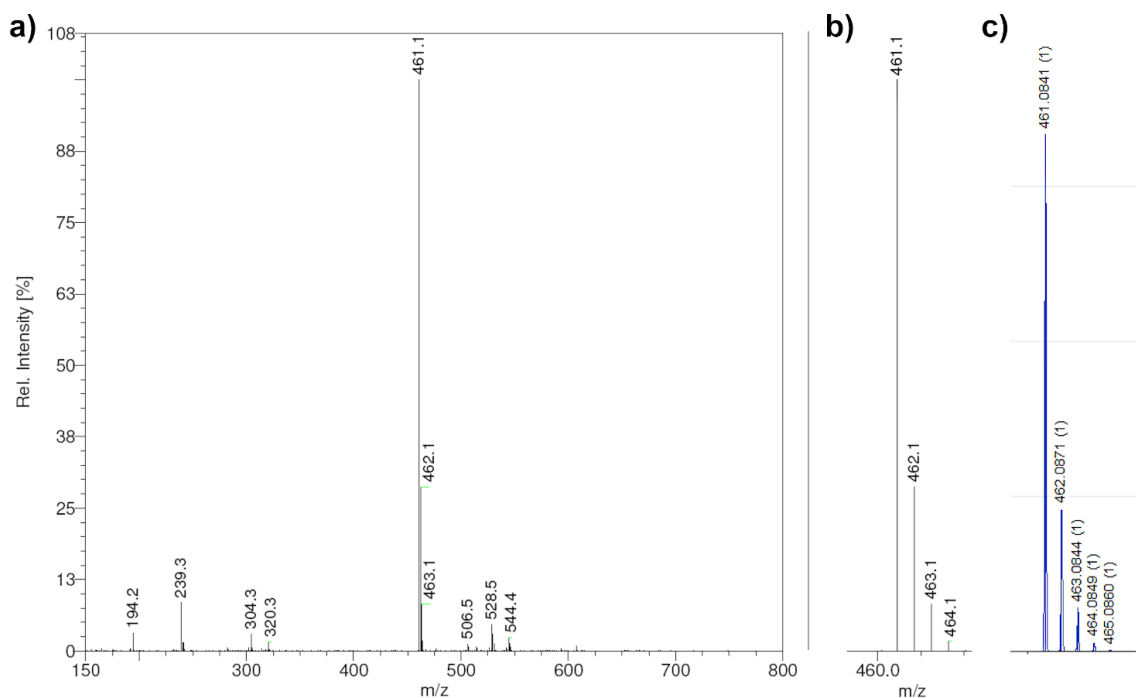

**Figure S3.** ESI-MS spectrum of a)  $[1s]Cl$  dissolved in methanol; b) the experimental isotopic distribution of the main signal; c) simulated isotopic distribution. ESI-MS found (calcd.) for  $[1s]^+$  m/z 461.1 (461.08).

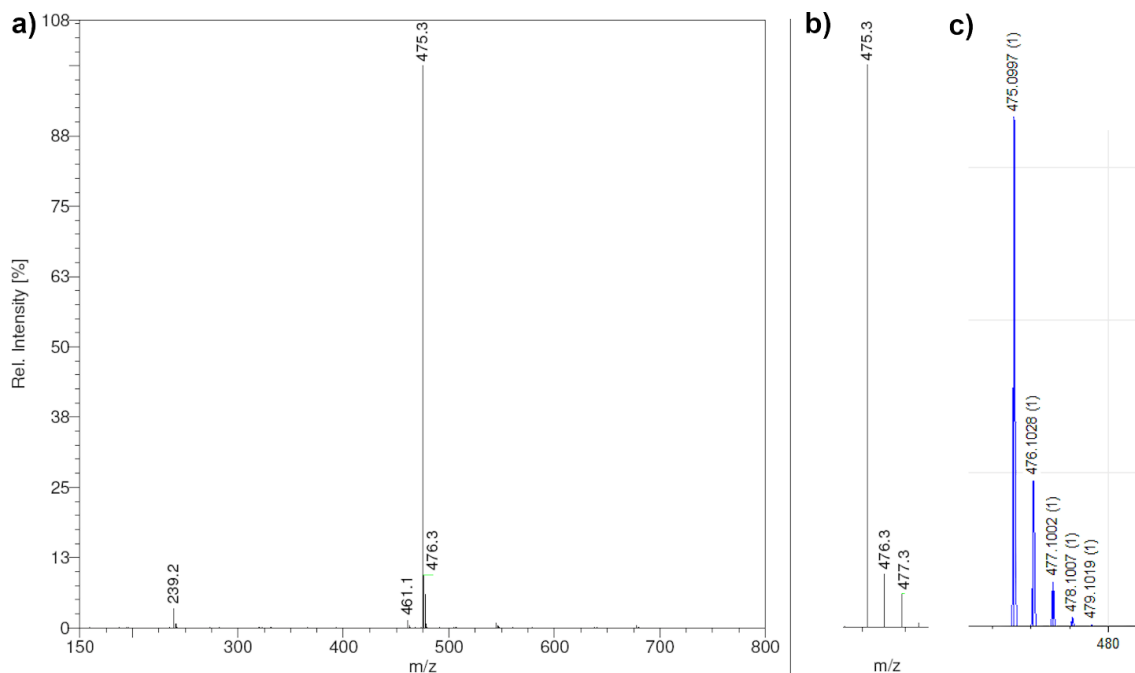

**Figure S4.** ESI-MS spectrum of a)  $[2s]Cl$  dissolved in acetonitrile; b) the experimental isotopic distribution of the main signal; c) simulated isotopic distribution. ESI-MS found (calcd.) for  $[2s]^+$  m/z 475.3 (475.1).

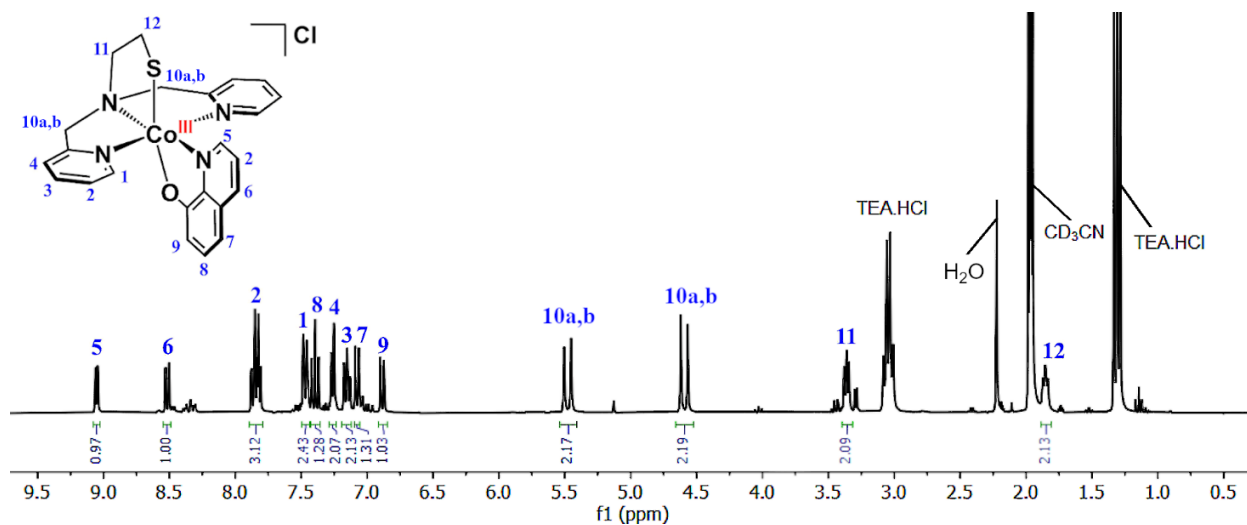

Figure S5.  $^1\text{H-NMR}$  spectrum of  $[1s]\text{Cl}$  dissolved in  $\text{CD}_3\text{CN}$ .

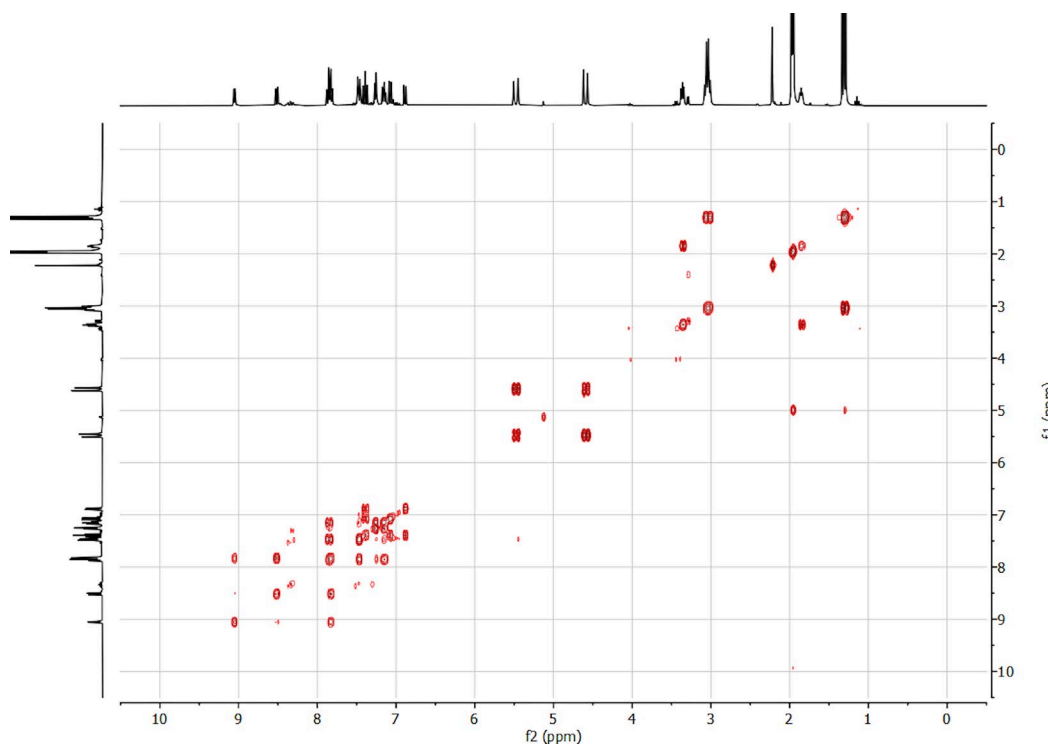

Figure S6.  $^1\text{H-}^1\text{H-COSY}$  NMR spectrum of  $[1s]\text{Cl}$  dissolved in  $\text{CD}_3\text{CN}$ .

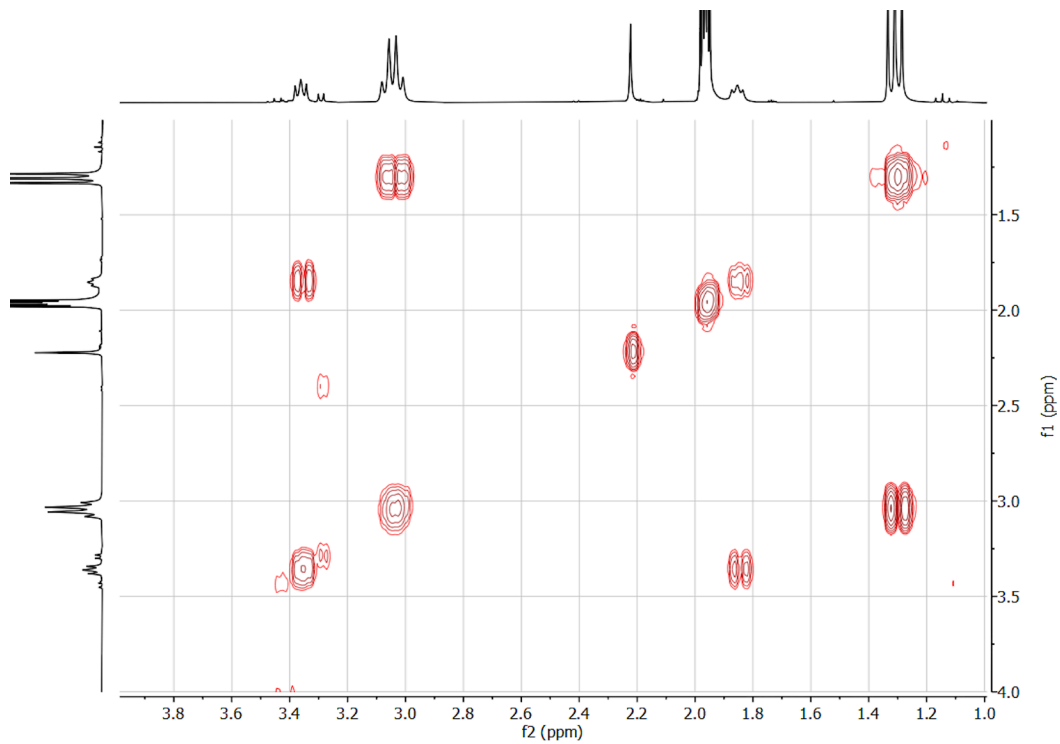

**Figure S7.**  $^1\text{H}$ - $^1\text{H}$ -COSY NMR spectrum of  $[1\text{s}]\text{Cl}$  dissolved in  $\text{CD}_3\text{CN}$ . The spectrum shows the correlation of protons in  $\text{N-CH}_2\text{-CH}_2\text{-S}$  (3.2–3.4 ppm and 1.84–1.87 ppm).

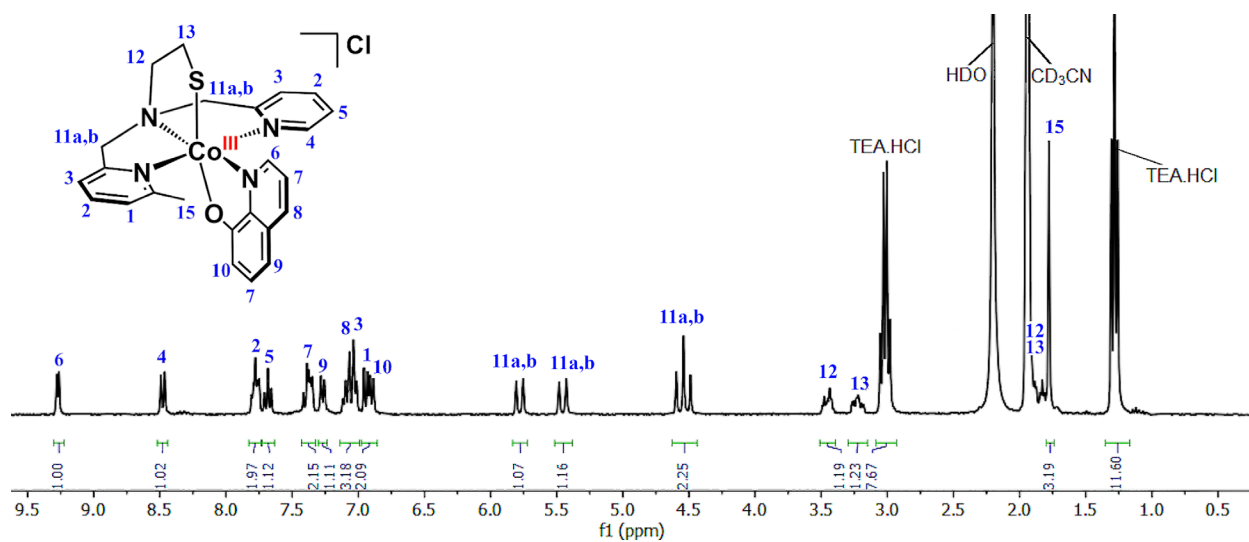

**Figure S8.**  $^1\text{H}$ -NMR spectrum of  $[2\text{s}]\text{Cl}$  dissolved in  $\text{CD}_3\text{CN}$ .

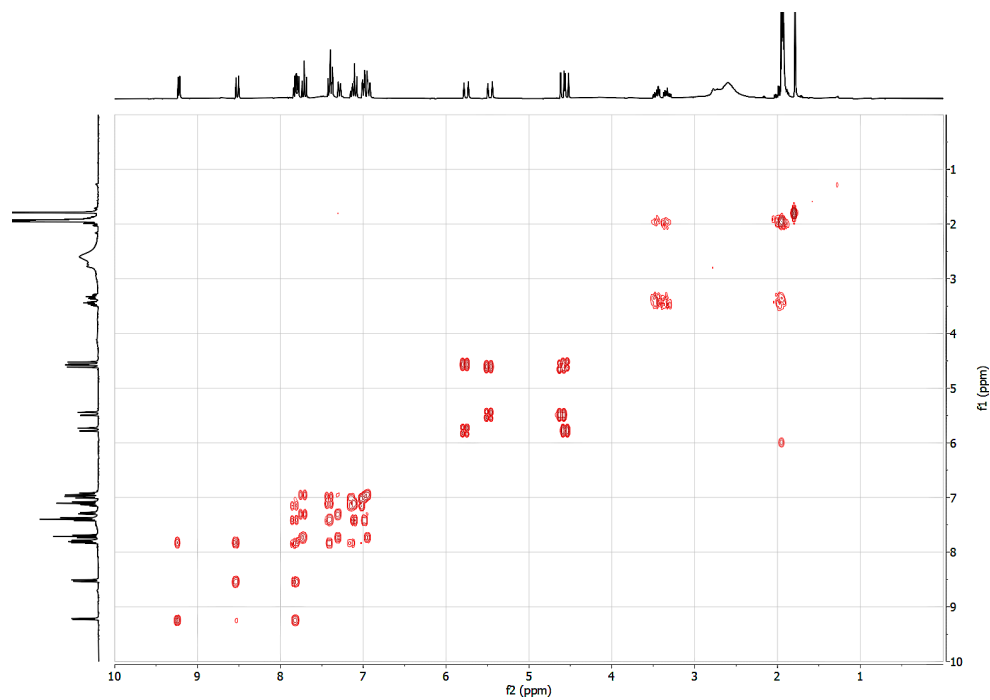

**Figure S9.**  $^1\text{H}$ - $^1\text{H}$ -COSY NMR spectrum of  $[\mathbf{2}_s]\text{Cl}$  dissolved in  $\text{CD}_3\text{CN}$ .

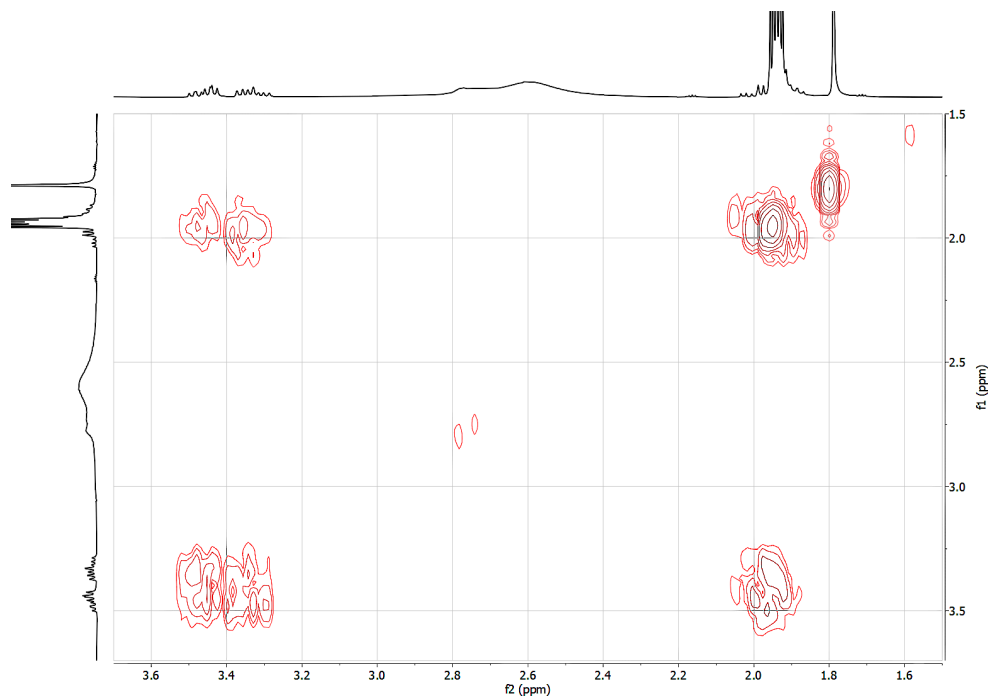

**Figure S10.**  $^1\text{H}$ - $^1\text{H}$ -COSY NMR spectrum of  $[\mathbf{2}_s]\text{Cl}$  dissolved in  $\text{CD}_3\text{CN}$ . The spectrum shows the correlation of protons in  $\text{N-CH}_2\text{-CH}_2\text{-S}$  (3.18–3.50 ppm) with the solvent peak (1.9 ppm), indicating that the solvent peak obscures the proton peak of interest.



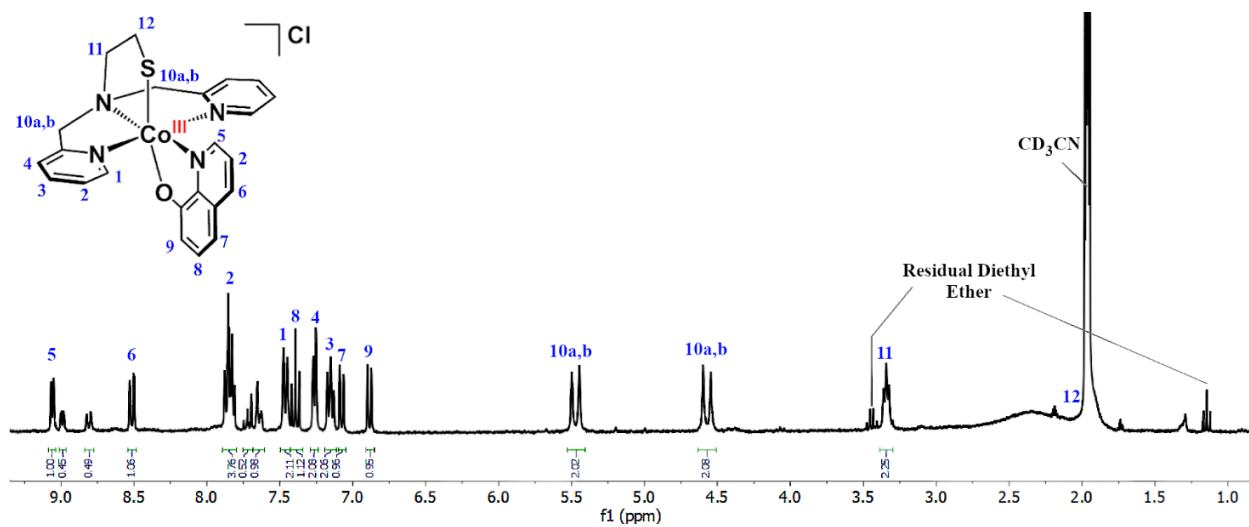

**Figure S11.** <sup>1</sup>H-NMR spectrum of [1<sub>S</sub>]Cl dissolved in CD<sub>3</sub>CN. The synthesis was done in absence of triethylamine. Impurities (as unlabeled peaks) are present mostly in the aromatic region.

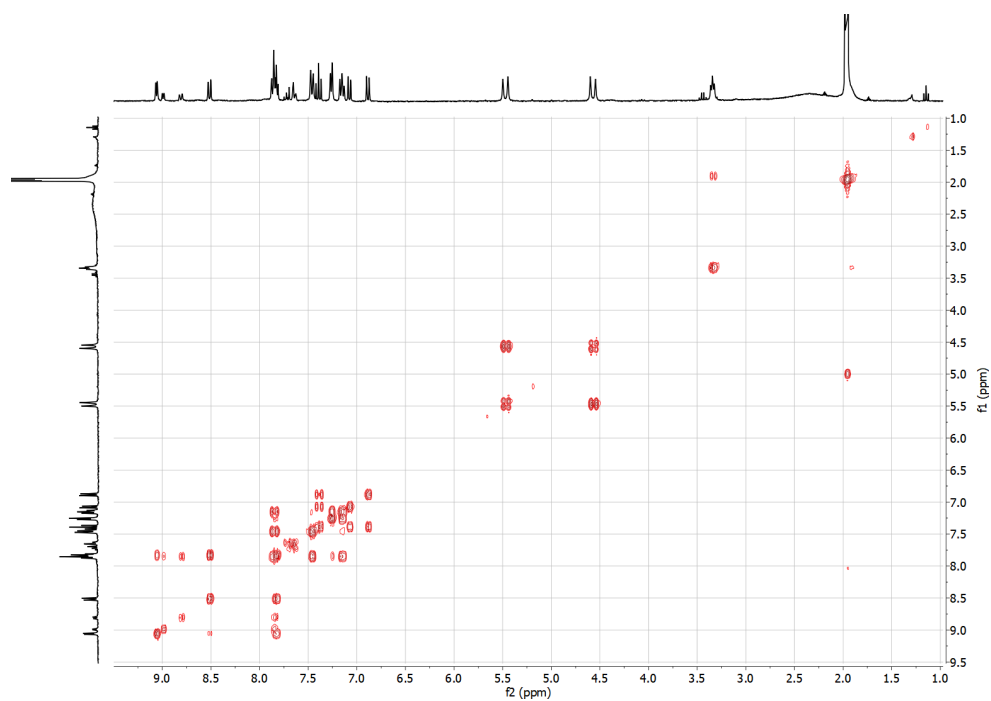

**Figure S12.** <sup>1</sup>H-<sup>1</sup>H-COSY NMR spectrum of [1<sub>S</sub>]Cl dissolved in CD<sub>3</sub>CN. The synthesis was done in absence of triethylamine.

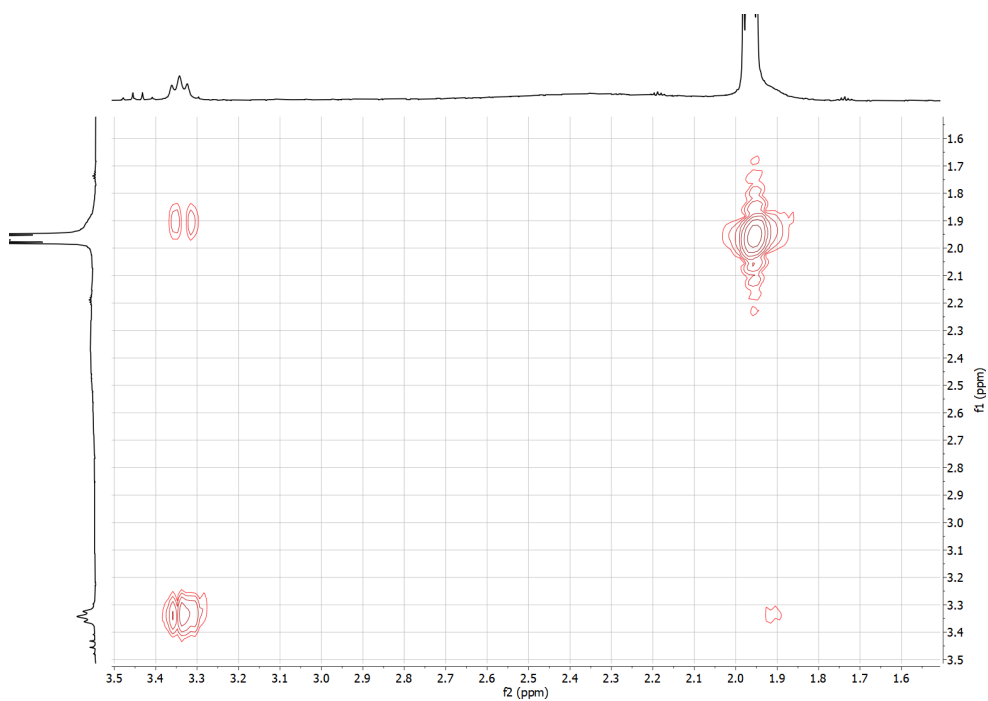

**Figure S13.**  $^1\text{H}$ - $^1\text{H}$ -COSY NMR spectrum of  $[1s]\text{Cl}$  dissolved in  $\text{CD}_3\text{CN}$ . The synthesis was done in absence of triethylamine. The spectrum shows the correlation of protons in  $\text{N-CH}_2\text{-CH}_2\text{-S}$  (3.2–3.4 ppm and 1.84–1.87 ppm).

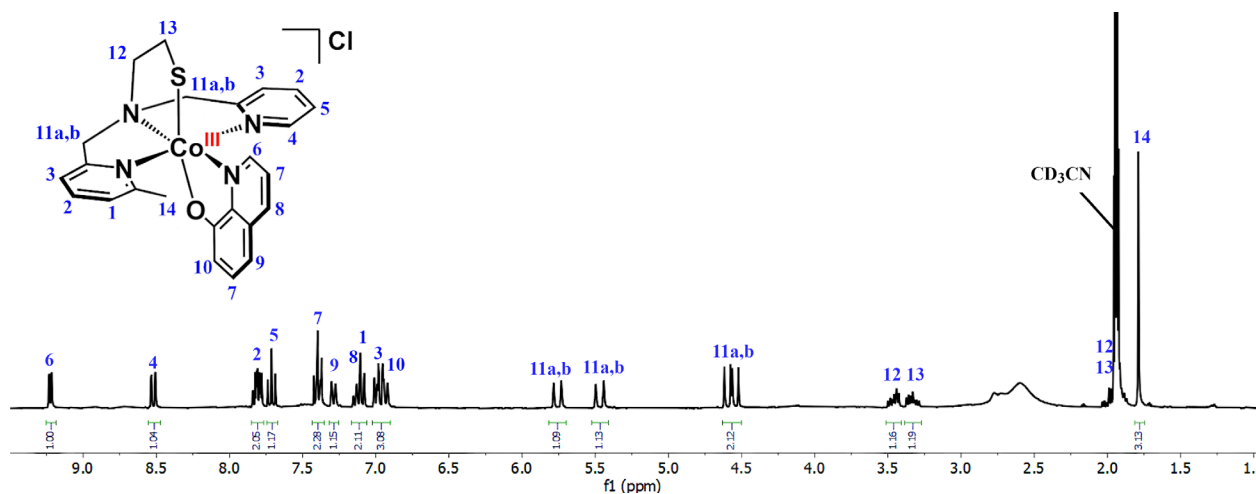

**Figure S14.**  $^1\text{H}$ -NMR spectrum of  $[2s]\text{Cl}$  dissolved in  $\text{CD}_3\text{CN}$ . The synthesis was done in absence of triethylamine.

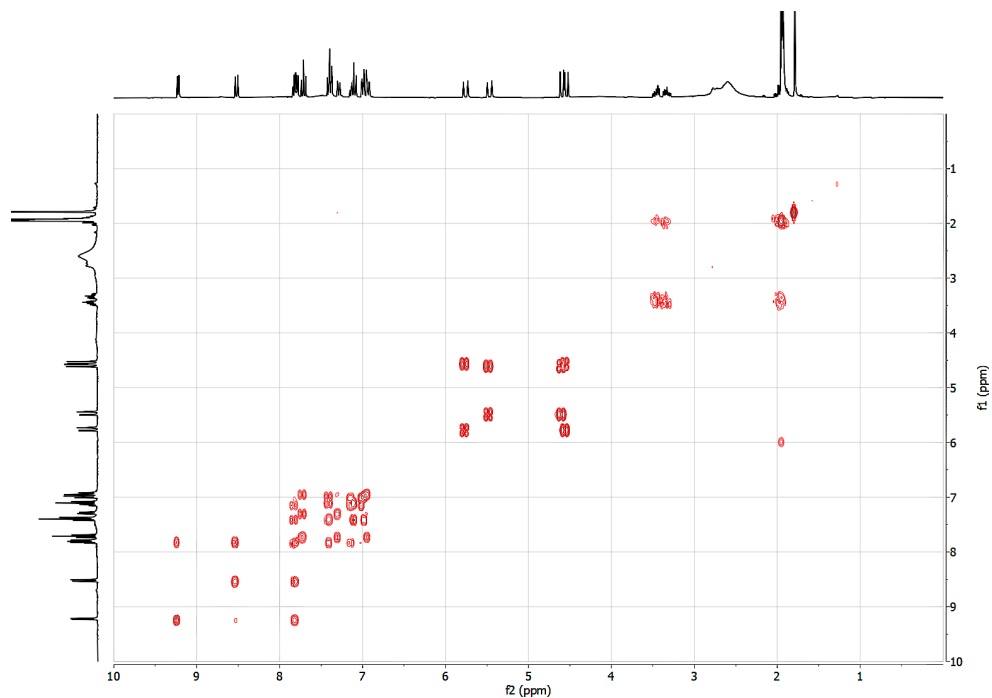

**Figure S15.**  $^1\text{H}$ - $^1\text{H}$ -COSY NMR spectrum of  $[2\text{s}]\text{Cl}$  dissolved in  $\text{CD}_3\text{CN}$ . The synthesis was done in absence of triethylamine.

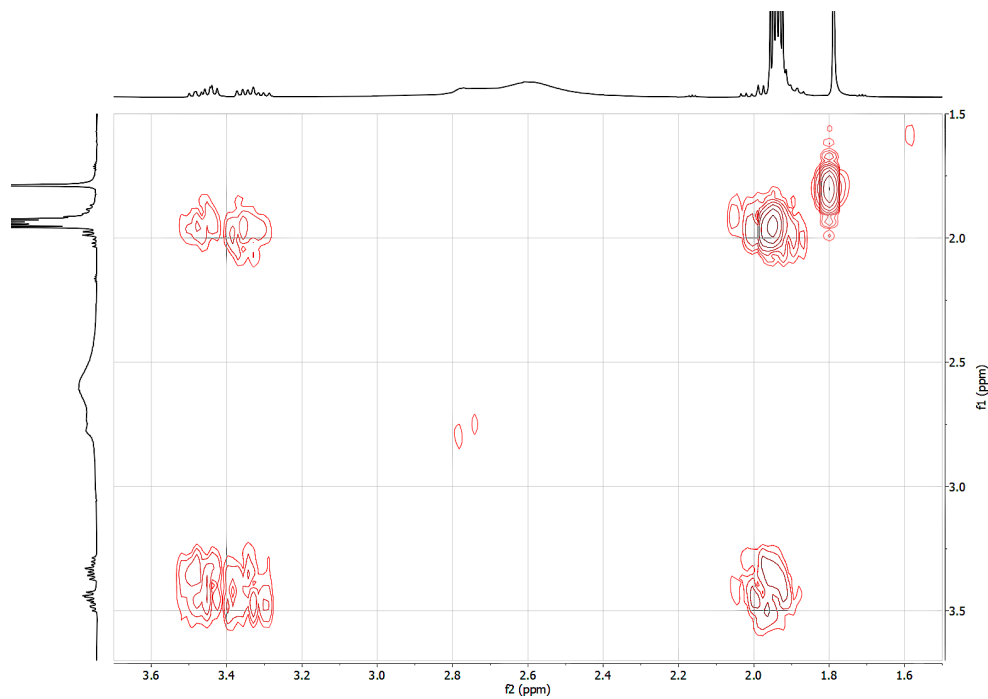

**Figure S16.**  $^1\text{H}$ - $^1\text{H}$ -COSY NMR spectrum of  $[2\text{s}]\text{Cl}$  dissolved in  $\text{CD}_3\text{CN}$ . The synthesis was done in absence of triethylamine. The spectrum shows the correlation of protons in  $\text{N-CH}_2\text{-CH}_2\text{-S}$  (3.18–3.50 ppm) with the solvent peak (1.9 ppm), indicating that the solvent peak obscures the proton peak of interest.

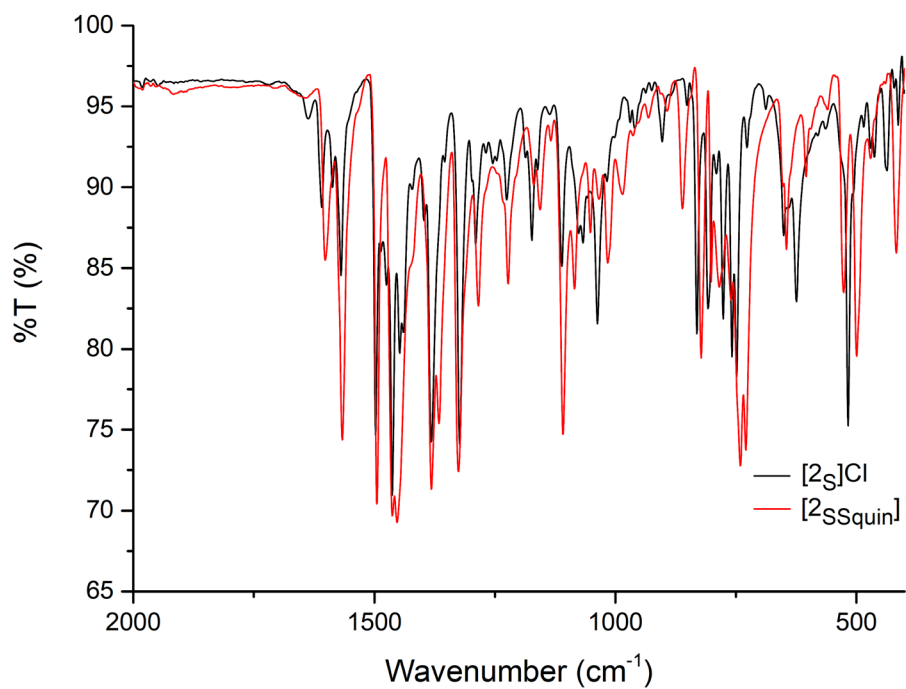

**Figure S17.** Infrared spectra of [2s]Cl (black trace) and [2ssquin] (red trace).

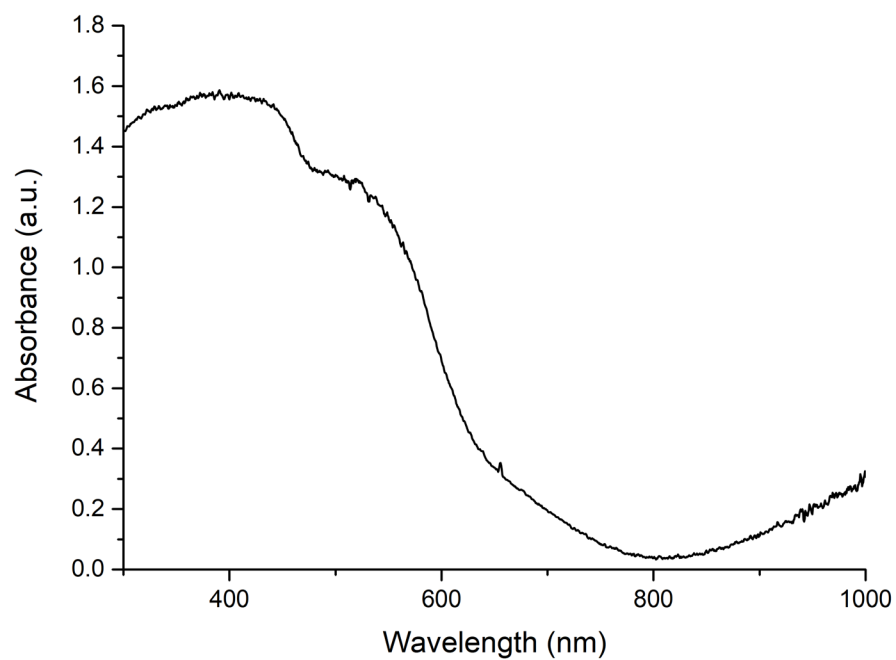

**Figure S18.** UV-visible diffuse reflectance spectrum of [2ssquin].

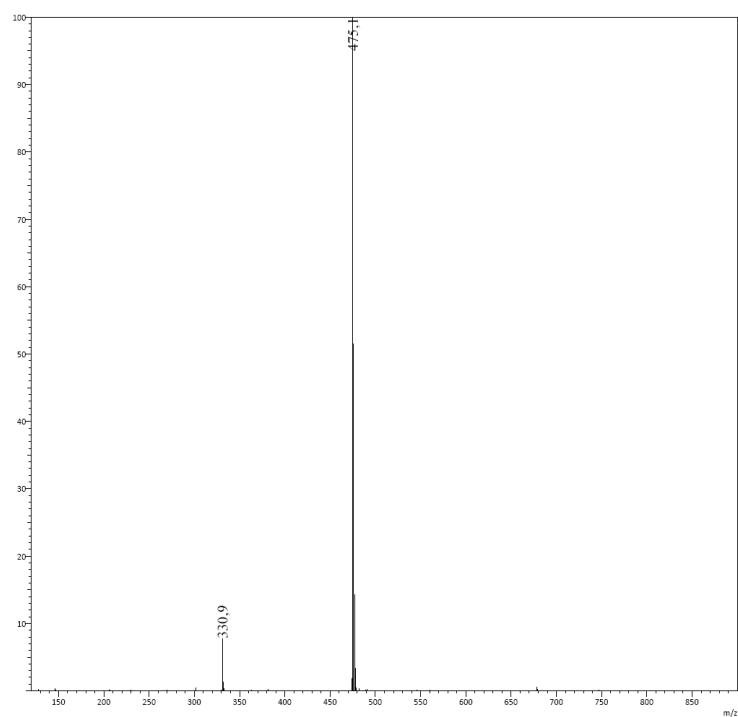

**Figure S19.** ESI-MS spectrum of [2<sub>ssquin</sub>] dissolved in methanol. ESI-MS found (calcd.) for [2<sub>s</sub>]<sup>+</sup> m/z 475.1 (475.1).

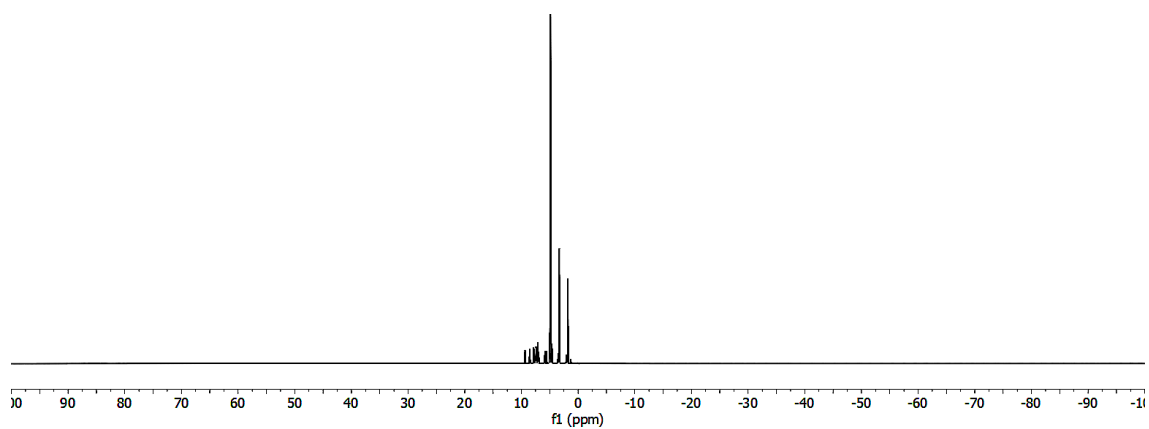

**Figure S20.** <sup>1</sup>H-NMR spectrum of [2<sub>ssquin</sub>] dissolved in CD<sub>3</sub>OD. The spectrum shows no presence of signals in the paramagnetic region.

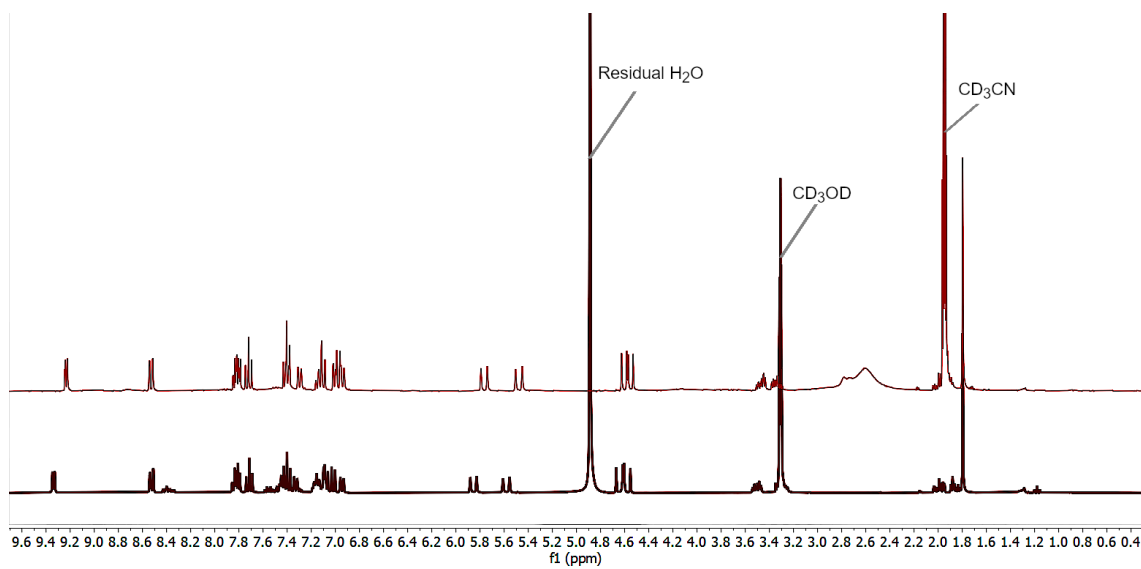

**Figure S21.** <sup>1</sup>H-NMR spectra of [2<sub>SSquin</sub>] dissolved in CD<sub>3</sub>OD (bottom spectrum) compared to that of [2<sub>s</sub>]Cl in CD<sub>3</sub>CN (top spectrum).

## Part 2 – Crystallographic Data

**Table S1.** Crystallographic data in the present work.

|                                                                                                                | [1 <sub>S</sub> ]Cl                                  | [2 <sub>S</sub> -Ag-2 <sub>S</sub> ](SbF <sub>6</sub> ) <sub>3</sub>                             | [2 <sub>SSquin</sub> ]                                                                                         |
|----------------------------------------------------------------------------------------------------------------|------------------------------------------------------|--------------------------------------------------------------------------------------------------|----------------------------------------------------------------------------------------------------------------|
| Chemical formula                                                                                               | C <sub>23</sub> H <sub>22</sub> CoN <sub>4</sub> OS· | C <sub>50</sub> H <sub>51</sub> AgCo <sub>2</sub> N <sub>9</sub> O <sub>2</sub> S <sub>2</sub> · | C <sub>48</sub> H <sub>48</sub> Cl <sub>2</sub> Co <sub>2</sub> N <sub>8</sub> O <sub>2</sub> S <sub>2</sub> · |
| <i>M<sub>r</sub></i>                                                                                           | 3(CH <sub>4</sub> O)·Cl<br>593.01                    | 3(F <sub>6</sub> Sb)·0.969(C <sub>2</sub> H <sub>3</sub> N)<br>1846.88                           | 0.903(C <sub>2</sub> H <sub>3</sub> N)<br>1058.87                                                              |
| Crystal system                                                                                                 | Triclinic                                            | Monoclinic                                                                                       | Monoclinic                                                                                                     |
| Space group                                                                                                    | <i>P</i> -1                                          | <i>P</i> 2 <sub>1</sub> / <i>c</i>                                                               | <i>P</i> 2 <sub>1</sub> / <i>n</i>                                                                             |
| Cell lengths ( <i>a</i> , <i>b</i> , <i>c</i> ) (Å)                                                            | 8.8184(3),<br>13.0506(5),<br>13.3362(5)              | 15.7072(5),<br>27.0793(6),<br>19.3101(6)                                                         | 18.4673(4),<br>14.9350(4),<br>19.1135(4)                                                                       |
| Cell angles (α, β, γ) (°)                                                                                      | 63.783(4),<br>73.530(3),<br>84.488(3)                | 90,<br>112.171(3),<br>90                                                                         | 90,<br>97.898(2),<br>90                                                                                        |
| Cell volume (Å <sup>3</sup> )                                                                                  | 1319.66(10)                                          | 7606.1 (4)                                                                                       | 5221.7(2)                                                                                                      |
| <i>Z</i>                                                                                                       | 2                                                    | 4                                                                                                | 4                                                                                                              |
| μ (mm <sup>-1</sup> )                                                                                          | 7.11                                                 | 1.87                                                                                             | 0.86                                                                                                           |
| Crystal size (mm)                                                                                              | 0.41 × 0.33 × 0.18                                   | 0.52 × 0.37 × 0.22                                                                               | 0.35 × 0.22 × 0.20                                                                                             |
| Temperature (K)                                                                                                | 110(2)                                               | 110(2)                                                                                           | 110(2)                                                                                                         |
| Diffractometer                                                                                                 | SuperNova, Dual, Cu<br>at zero, Atlas<br>detector    | SuperNova, Dual, Cu at<br>zero, Atlas detector                                                   | SuperNova, Dual, Cu<br>at zero, Atlas detector                                                                 |
| Radiation type                                                                                                 | Cu <i>K</i> α                                        | Mo <i>K</i> α                                                                                    | Mo <i>K</i> α                                                                                                  |
| <i>T<sub>min</sub></i> , <i>T<sub>max</sub></i>                                                                | 0.161, 0.410                                         | 0.295, 1.000                                                                                     | 0.425, 1.000                                                                                                   |
| No. of measured,<br>independent and observed<br>[ <i>I</i> > 2σ( <i>I</i> )] reflections                       | 16974,<br>5155,<br>5078                              | 61799,<br>21893,<br>14227                                                                        | 62110,<br>11982,<br>9923                                                                                       |
| <i>R<sub>int</sub></i>                                                                                         | 0.025                                                | 0.048                                                                                            | 0.045                                                                                                          |
| (sin θ/λ) <sub>max</sub> (Å <sup>-1</sup> )                                                                    | 0.616                                                | 0.650                                                                                            | 0.650                                                                                                          |
| <i>R</i> [ <i>F</i> <sup>2</sup> > 2σ( <i>F</i> <sup>2</sup> )], <i>wR</i> ( <i>F</i> <sup>2</sup> ), <i>S</i> | 0.028, 0.071, 1.05                                   | 0.072, 0.231, 1.07                                                                               | 0.048, 0.128, 1.03                                                                                             |
| No. of reflections                                                                                             | 5155                                                 | 21893                                                                                            | 11982                                                                                                          |
| No. of parameters                                                                                              | 340                                                  | 1385                                                                                             | 618                                                                                                            |
| No. of restraints                                                                                              | -                                                    | 2501                                                                                             | 2                                                                                                              |
| H-atom treatment                                                                                               | H-atom parameters<br>constrained                     | H-atom parameters<br>constrained                                                                 | H-atom parameters<br>constrained                                                                               |
| Δρ <sub>max</sub> , Δρ <sub>min</sub> (e Å <sup>-3</sup> )                                                     | 0.28, -0.46                                          | 1.75, -1.28                                                                                      | 0.69, -0.59                                                                                                    |

### Part 3 – Computational Data

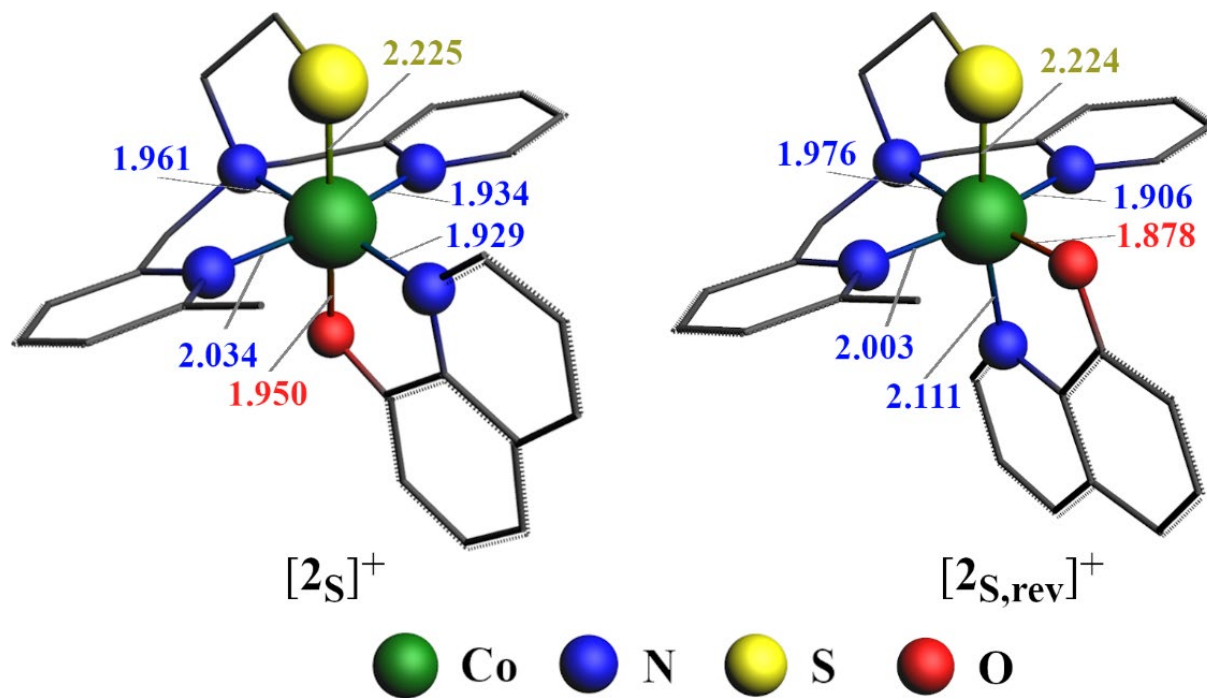

Figure S22. Optimized geometries of  $[2S]^+$  and  $[2S,rev]^+$  with selected bond distances (Å).



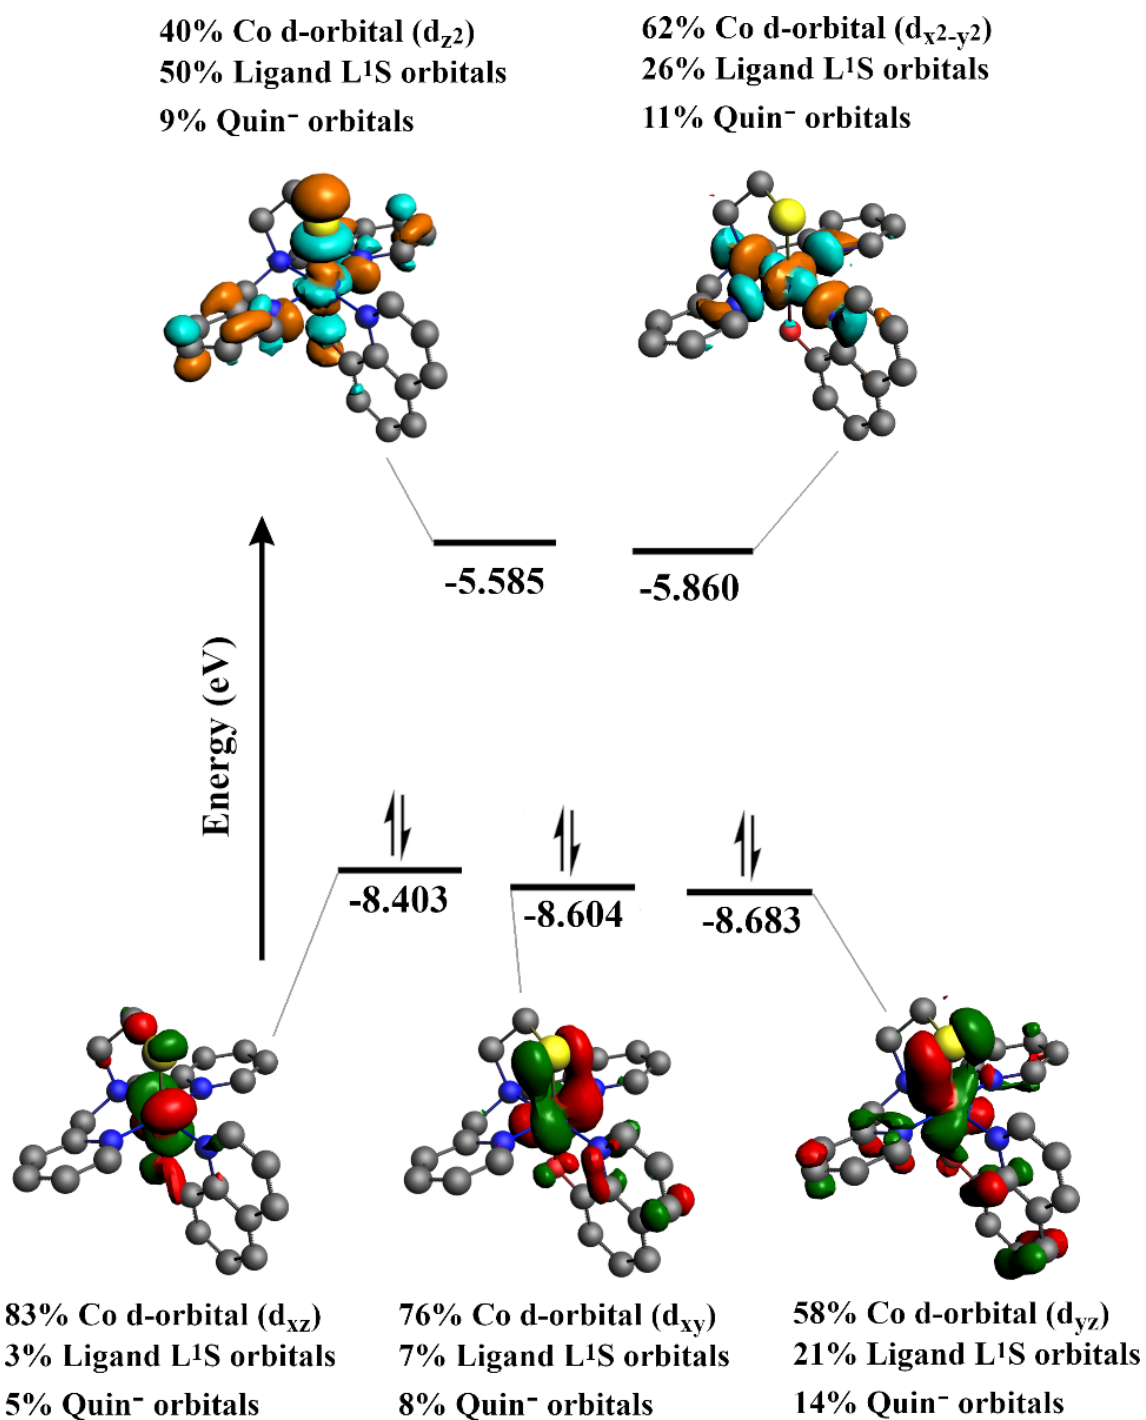

**Figure S23.** Several frontier orbitals of  $[1s]^+$  associated with Co d-orbitals along with their energies, orbital visualization, and orbital composition.

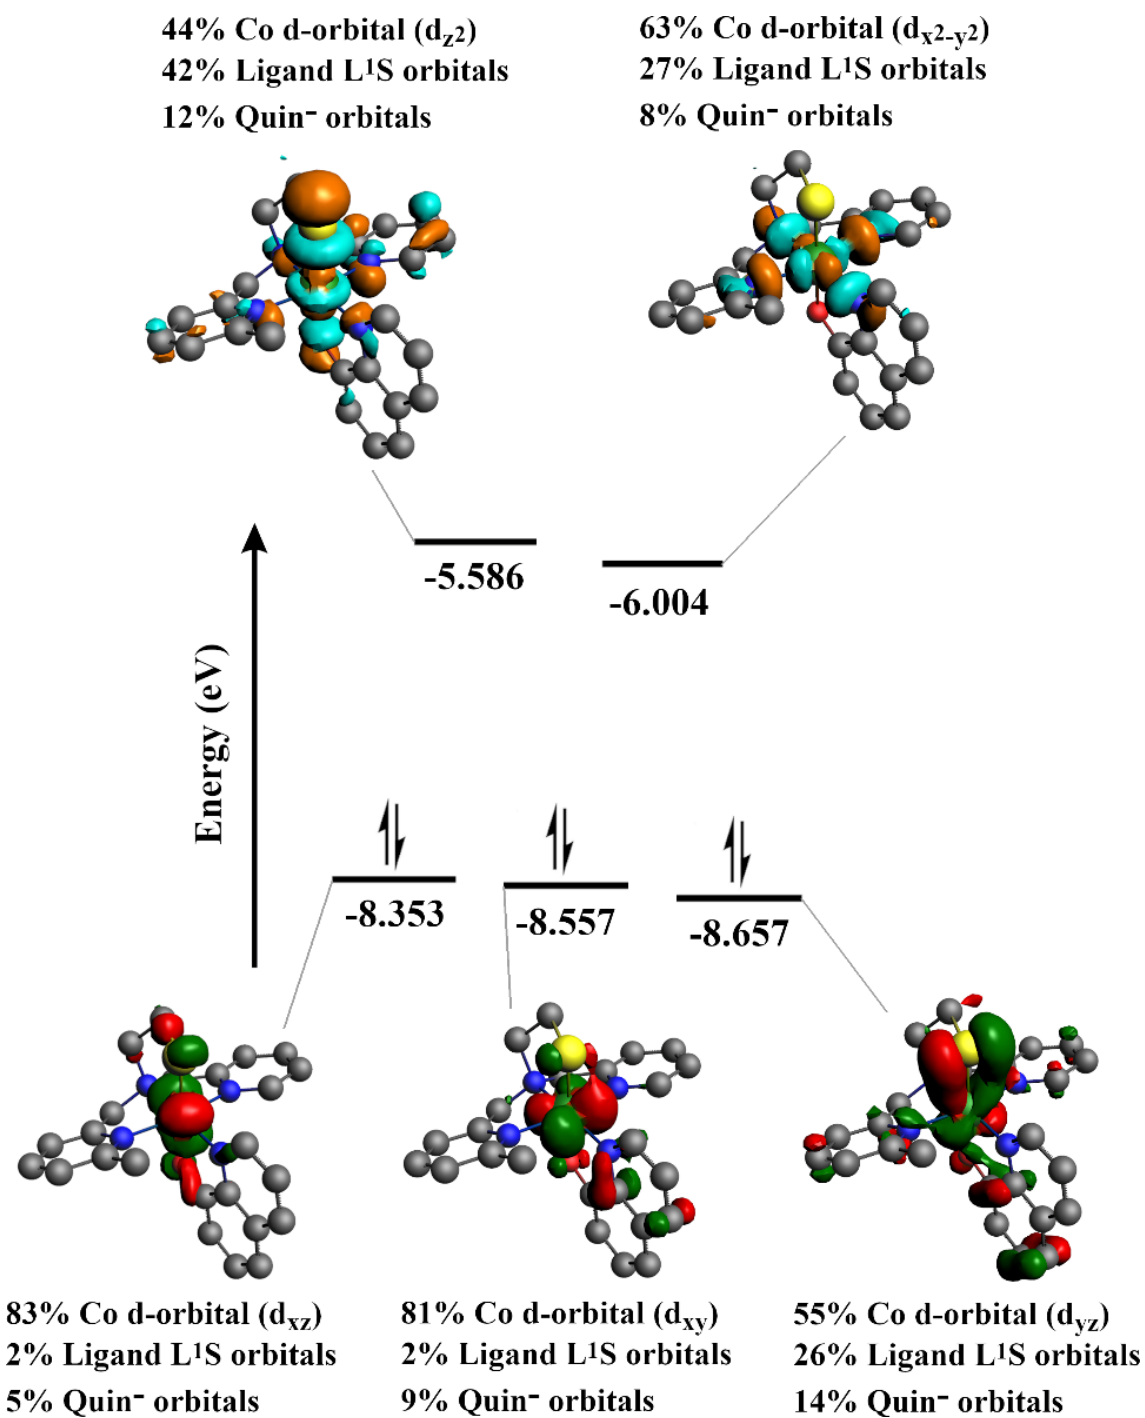

Figure S24. Several frontier orbitals of [2s]<sup>+</sup> associated with Co d-orbitals along with their energies, orbital visualization, and orbital composition.

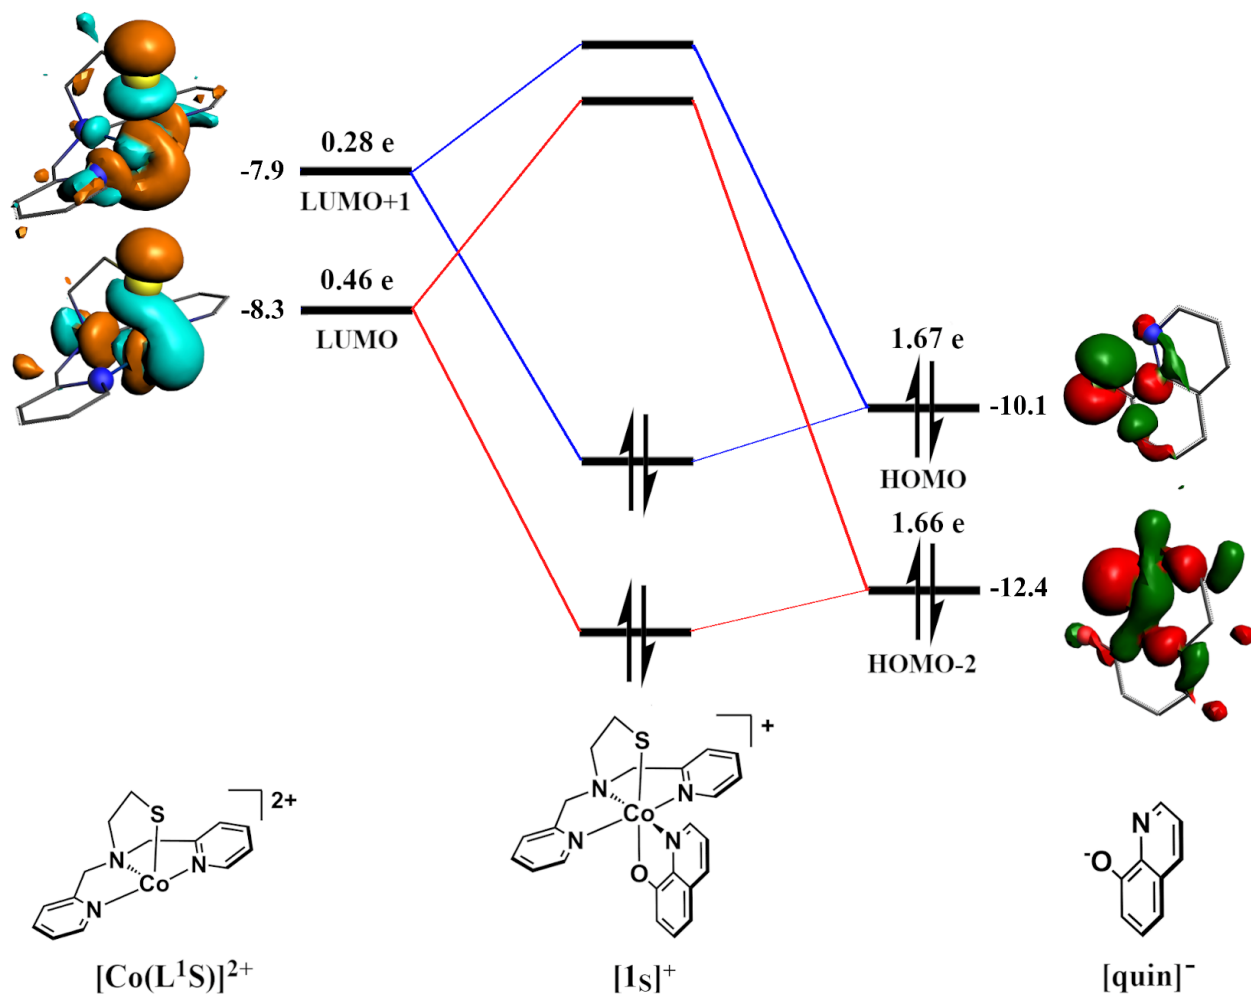

**Figure S25.** Molecular orbital diagram for the interaction between the fragments  $[\text{Co}(\text{L}^1\text{S})]^{2+}$  and  $[\text{quin}]^-$  in  $[1\text{s}]^+$ . Fragment molecular orbital energies (in eV) obtained from the Kohn-Sham Fock matrix diagonal elements (see references<sup>1-3</sup> for details).

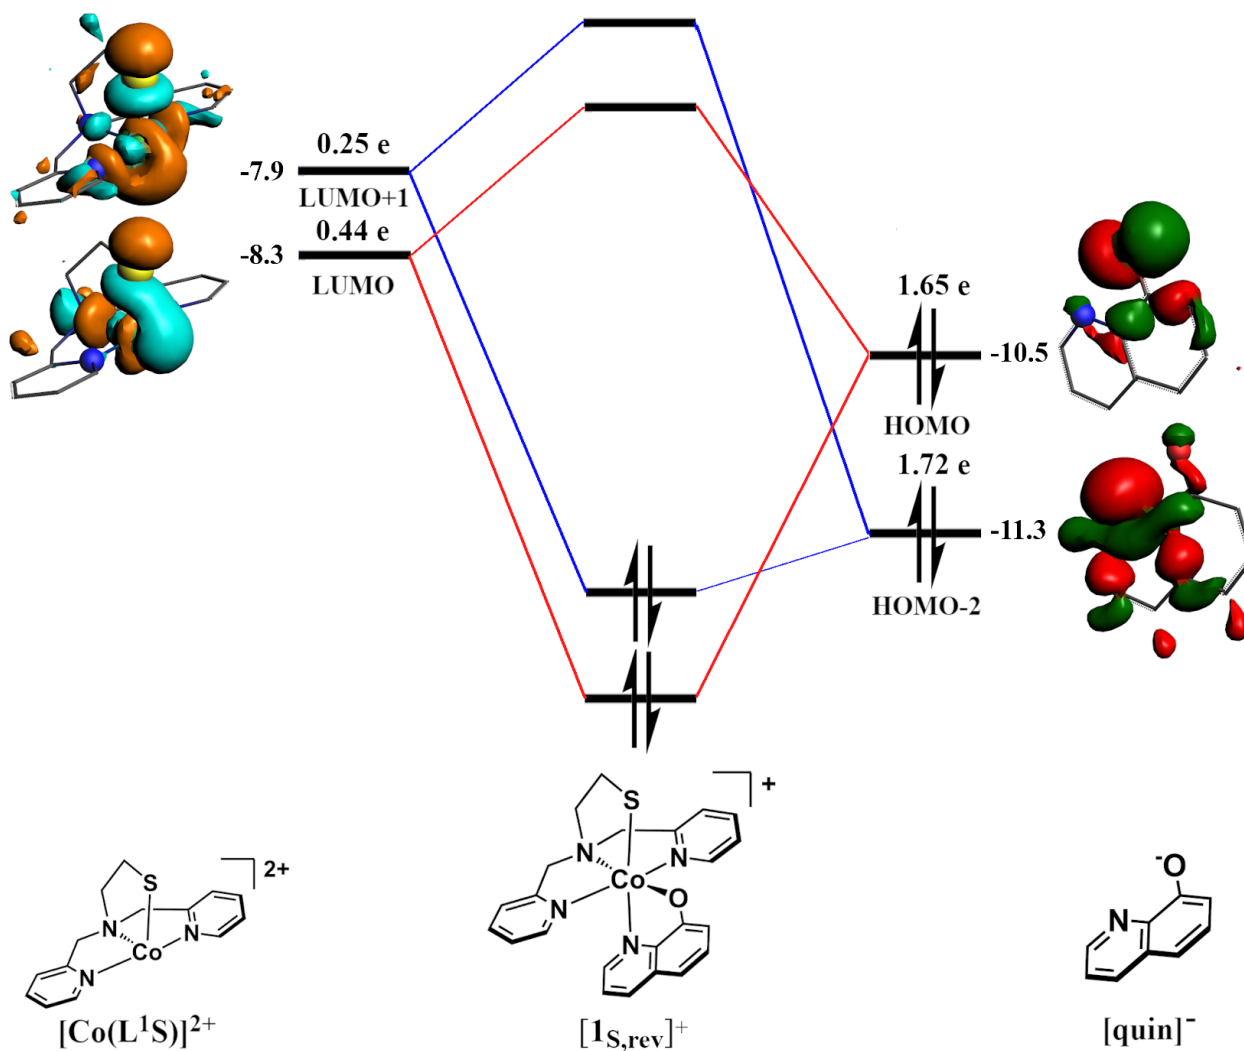

**Figure S26.** Molecular orbital diagram for the interaction between the fragments  $[Co(L^1S)]^{2+}$  and  $[quin]^-$  in  $[1s,rev]^+$ . Fragment molecular orbital energies (in eV) obtained from the Kohn-Sham Fock matrix diagonal elements (see references<sup>1-3</sup> for details).

**Table S2.** Coordinates of optimized structure of  $[\mathbf{1s}]^+$  and  $[\mathbf{1s,rev}]^+$  with  $S = 0$  in gas phase and its respective bond energies.

| $[\mathbf{1s}]^+$ E = -7679.01 kcal/mol |           |           |           | $[\mathbf{1s,rev}]^+$ E = -7670.11 kcal/mol |           |           |           |
|-----------------------------------------|-----------|-----------|-----------|---------------------------------------------|-----------|-----------|-----------|
| 1.Co                                    | 3.279748  | 10.503220 | 2.619490  | 1.Co                                        | 3.362363  | 10.390019 | 2.731247  |
| 2.C                                     | 3.882402  | 7.550336  | 2.684559  | 2.C                                         | 3.839856  | 7.416124  | 2.322387  |
| 3.H                                     | 4.589879  | 6.733148  | 2.874284  | 3.H                                         | 4.525238  | 6.560191  | 2.373994  |
| 4.H                                     | 2.872634  | 7.154426  | 2.845957  | 4.H                                         | 2.820460  | 7.025831  | 2.433893  |
| 5.C                                     | 4.087507  | 8.064243  | 1.282862  | 5.C                                         | 4.049562  | 8.135736  | 1.019628  |
| 6.H                                     | 5.148175  | 8.301013  | 1.156863  | 6.H                                         | 5.115049  | 8.365680  | 0.926076  |
| 7.H                                     | 3.801230  | 7.336994  | 0.507684  | 7.H                                         | 3.740196  | 7.553406  | 0.137179  |
| 8.C                                     | 4.039056  | 10.133217 | 0.001366  | 8.C                                         | 4.053077  | 10.340320 | 0.048227  |
| 9.H                                     | 3.344516  | 10.882988 | -0.390274 | 9.H                                         | 3.396794  | 11.153518 | -0.272255 |
| 10.H                                    | 4.372071  | 9.494365  | -0.826931 | 10.H                                        | 4.363840  | 9.797019  | -0.854698 |
| 11.C                                    | 1.915321  | 9.096503  | 0.668040  | 11.C                                        | 1.888974  | 9.261954  | 0.647997  |
| 12.H                                    | 1.817325  | 8.195318  | 0.050239  | 12.H                                        | 1.752736  | 8.408608  | -0.028560 |
| 13.H                                    | 1.570377  | 9.952293  | 0.077991  | 13.H                                        | 1.529517  | 10.146696 | 0.113089  |
| 14.C                                    | 5.180680  | 10.842227 | 0.656538  | 14.C                                        | 5.234510  | 10.909247 | 0.780580  |
| 15.C                                    | 6.350936  | 11.199438 | -0.001414 | 15.C                                        | 6.417136  | 11.296710 | 0.164635  |
| 16.H                                    | 6.484933  | 10.933555 | -1.048134 | 16.H                                        | 6.533341  | 11.180029 | -0.911113 |
| 17.C                                    | 7.335539  | 11.892321 | 0.694154  | 17.C                                        | 7.443003  | 11.824971 | 0.943234  |
| 18.H                                    | 8.259622  | 12.185632 | 0.198521  | 18.H                                        | 8.378827  | 12.137226 | 0.482215  |
| 19.C                                    | 7.121767  | 12.186072 | 2.035499  | 19.C                                        | 7.258188  | 11.925334 | 2.317022  |
| 20.H                                    | 7.865091  | 12.714781 | 2.628297  | 20.H                                        | 8.037973  | 12.314066 | 2.968635  |
| 21.C                                    | 5.936552  | 11.783688 | 2.634418  | 21.C                                        | 6.056469  | 11.505438 | 2.870866  |
| 22.H                                    | 5.746258  | 11.977403 | 3.684078  | 22.H                                        | 5.865683  | 11.537338 | 3.939211  |
| 23.C                                    | 1.071863  | 9.018473  | 1.899572  | 23.C                                        | 1.083506  | 9.087489  | 1.904384  |
| 24.C                                    | -0.149919 | 8.357037  | 1.950615  | 24.C                                        | -0.158663 | 8.464732  | 1.938841  |
| 25.H                                    | -0.513314 | 7.823641  | 1.074376  | 25.H                                        | -0.583420 | 8.047077  | 1.027861  |
| 26.C                                    | -0.886172 | 8.385938  | 3.128721  | 26.C                                        | -0.836353 | 8.377207  | 3.150324  |
| 27.H                                    | -1.847051 | 7.877627  | 3.192271  | 27.H                                        | -1.810976 | 7.894156  | 3.201351  |
| 28.C                                    | -0.363168 | 9.062033  | 4.225474  | 28.C                                        | -0.238668 | 8.896554  | 4.293864  |
| 29.H                                    | -0.893101 | 9.103719  | 5.174603  | 29.H                                        | -0.722124 | 8.833758  | 5.266455  |
| 30.C                                    | 0.868621  | 9.688299  | 4.107769  | 30.C                                        | 1.008935  | 9.494474  | 4.192032  |
| 31.H                                    | 1.319312  | 10.203537 | 4.948117  | 31.H                                        | 1.540177  | 9.889450  | 5.052495  |
| 32.C                                    | 2.565748  | 12.935113 | 3.638929  | 32.C                                        | 2.527772  | 12.988420 | 3.481121  |
| 33.C                                    | 2.364011  | 14.047149 | 4.507509  | 33.C                                        | 2.016957  | 14.318426 | 3.583513  |
| 34.C                                    | 2.816281  | 13.900787 | 5.838943  | 34.C                                        | 1.414523  | 14.858254 | 2.425930  |
| 35.H                                    | 2.688468  | 14.720345 | 6.545644  | 35.H                                        | 1.007769  | 15.868959 | 2.447202  |
| 36.C                                    | 3.412101  | 12.723837 | 6.233835  | 36.C                                        | 1.341402  | 14.094862 | 1.284894  |
| 37.H                                    | 3.766298  | 12.582646 | 7.253002  | 37.H                                        | 0.876043  | 14.473280 | 0.376869  |
| 38.C                                    | 3.570326  | 11.672793 | 5.314947  | 38.C                                        | 1.879034  | 12.796658 | 1.283400  |
| 39.H                                    | 4.025622  | 10.730938 | 5.611194  | 39.H                                        | 1.806846  | 12.208780 | 0.373891  |
| 40.C                                    | 2.153944  | 12.949468 | 2.277115  | 40.C                                        | 3.123197  | 12.345931 | 4.599477  |
| 41.C                                    | 1.532904  | 14.107898 | 1.803654  | 41.C                                        | 3.215710  | 13.050978 | 5.800943  |
| 42.H                                    | 1.203775  | 14.150219 | 0.766868  | 42.H                                        | 3.668012  | 12.566651 | 6.664731  |
| 43.C                                    | 1.335969  | 15.203042 | 2.658766  | 43.C                                        | 2.723464  | 14.361096 | 5.888526  |
| 44.H                                    | 0.848789  | 16.091516 | 2.257143  | 44.H                                        | 2.809417  | 14.885689 | 6.839976  |
| 45.C                                    | 1.734658  | 15.195374 | 3.983668  | 45.C                                        | 2.131789  | 14.998320 | 4.813681  |
| 46.H                                    | 1.568210  | 16.059449 | 4.623171  | 46.H                                        | 1.750165  | 16.012927 | 4.905457  |

|      |          |           |          |      |          |           |          |
|------|----------|-----------|----------|------|----------|-----------|----------|
| 47.O | 2.381248 | 11.876598 | 1.558462 | 47.O | 3.549579 | 11.110027 | 4.460062 |
| 48.S | 4.265607 | 8.903673  | 3.812138 | 48.S | 4.279877 | 8.571608  | 3.627390 |
| 49.N | 3.331548 | 9.342443  | 1.040060 | 49.N | 3.320526 | 9.456257  | 0.986598 |
| 50.N | 4.974697 | 11.136824 | 1.958919 | 50.N | 5.057389 | 11.025339 | 2.115064 |
| 51.N | 1.568541 | 9.685143  | 2.962259 | 51.N | 1.645482 | 9.607496  | 3.015377 |
| 52.N | 3.161850 | 11.775229 | 4.051192 | 52.N | 2.469730 | 12.243248 | 2.337247 |

**Table S3.** Coordinates of optimized structure of  $[2s]^+$  and  $[2s,rev]^+$  with  $S = 0$  in gas phase and its respective bond energies.

| $[2s]^+$ E = -8053.87 kcal/mol |           |           |           | $[2s,rev]^+$ E = -8046.52 kcal/mol |           |           |           |
|--------------------------------|-----------|-----------|-----------|------------------------------------|-----------|-----------|-----------|
| 1.Co                           | 3.304817  | 10.529338 | 2.660171  | 1.Co                               | 3.273435  | 10.505905 | 2.688802  |
| 2.C                            | 3.909025  | 7.569890  | 2.707034  | 2.C                                | 3.839606  | 7.516793  | 2.538756  |
| 3.H                            | 4.624952  | 6.760303  | 2.897134  | 3.H                                | 4.554478  | 6.695593  | 2.677757  |
| 4.H                            | 2.902577  | 7.157822  | 2.849209  | 4.H                                | 2.832445  | 7.098184  | 2.658947  |
| 5.C                            | 4.125771  | 8.104276  | 1.314865  | 5.C                                | 4.055882  | 8.137379  | 1.187188  |
| 6.H                            | 5.182922  | 8.362544  | 1.204929  | 6.H                                | 5.113854  | 8.399292  | 1.095465  |
| 7.H                            | 3.862192  | 7.380918  | 0.527914  | 7.H                                | 3.787009  | 7.475019  | 0.349208  |
| 8.C                            | 4.016190  | 10.166803 | 0.028446  | 8.C                                | 3.975205  | 10.245299 | 0.028971  |
| 9.H                            | 3.308569  | 10.919119 | -0.331458 | 9.H                                | 3.288279  | 11.000401 | -0.358135 |
| 10.H                           | 4.313921  | 9.531405  | -0.816386 | 10.H                               | 4.297890  | 9.637029  | -0.827850 |
| 11.C                           | 1.938749  | 9.100497  | 0.704654  | 11.C                               | 1.863047  | 9.149652  | 0.693304  |
| 12.H                           | 1.857024  | 8.188491  | 0.100856  | 12.H                               | 1.767796  | 8.236784  | 0.091746  |
| 13.H                           | 1.587066  | 9.940407  | 0.095853  | 13.H                               | 1.486247  | 9.973483  | 0.078565  |
| 14.C                           | 5.192667  | 10.864545 | 0.623502  | 14.C                               | 5.150993  | 10.914063 | 0.676045  |
| 15.C                           | 6.282914  | 11.198810 | -0.166205 | 15.C                               | 6.258273  | 11.266322 | -0.079055 |
| 16.H                           | 6.287745  | 10.929891 | -1.220402 | 16.H                               | 6.278614  | 11.050620 | -1.145381 |
| 17.C                           | 7.348283  | 11.869470 | 0.415245  | 17.C                               | 7.329044  | 11.881468 | 0.555950  |
| 18.H                           | 8.218744  | 12.159935 | -0.171238 | 18.H                               | 8.215292  | 12.181317 | -0.001451 |
| 19.C                           | 7.285328  | 12.127296 | 1.772512  | 19.C                               | 7.252483  | 12.066851 | 1.923517  |
| 20.H                           | 8.112262  | 12.619289 | 2.279226  | 20.H                               | 8.084429  | 12.509323 | 2.466645  |
| 21.C                           | 6.172921  | 11.749491 | 2.534006  | 21.C                               | 6.119840  | 11.678214 | 2.652501  |
| 22.N                           | 3.069740  | 11.782490 | 4.108263  | 22.N                               | 2.332746  | 12.297774 | 2.088531  |
| 23.C                           | 1.090538  | 9.034039  | 1.927316  | 23.C                               | 1.044337  | 9.062415  | 1.944942  |
| 24.C                           | -0.128685 | 8.367342  | 1.973603  | 24.C                               | -0.178515 | 8.406395  | 2.021570  |
| 25.H                           | -0.479738 | 7.826164  | 1.097099  | 25.H                               | -0.576526 | 7.896683  | 1.146093  |
| 26.C                           | -0.875796 | 8.400582  | 3.143623  | 26.C                               | -0.869424 | 8.405015  | 3.228162  |
| 27.H                           | -1.834849 | 7.888487  | 3.203995  | 27.H                               | -1.829725 | 7.898547  | 3.312470  |
| 28.C                           | -0.361294 | 9.087639  | 4.237037  | 28.C                               | -0.300263 | 9.041056  | 4.326266  |
| 29.H                           | -0.895618 | 9.135097  | 5.183449  | 29.H                               | -0.791493 | 9.048278  | 5.296943  |
| 30.C                           | 0.867751  | 9.719201  | 4.123322  | 30.C                               | 0.929366  | 9.667069  | 4.184845  |
| 31.H                           | 1.301755  | 10.241529 | 4.966376  | 31.H                               | 1.438541  | 10.151907 | 5.011272  |
| 32.C                           | 2.500906  | 12.947248 | 3.672746  | 32.C                               | 2.261734  | 13.118329 | 3.179079  |
| 33.C                           | 2.199950  | 14.033661 | 4.545453  | 33.C                               | 1.683025  | 14.423894 | 3.152228  |
| 34.C                           | 2.494818  | 13.845447 | 5.914971  | 34.C                               | 1.154756  | 14.859532 | 1.917390  |
| 35.H                           | 2.283974  | 14.642168 | 6.627949  | 35.H                               | 0.703301  | 15.848100 | 1.838311  |
| 36.C                           | 3.032841  | 12.651001 | 6.339156  | 36.C                               | 1.206525  | 14.020301 | 0.830054  |
| 37.H                           | 3.258114  | 12.472703 | 7.388811  | 37.H                               | 0.798843  | 14.314477 | -0.135129 |
| 38.C                           | 3.309552  | 11.635133 | 5.409629  | 38.C                               | 1.799451  | 12.753119 | 0.959482  |
| 39.H                           | 3.734134  | 10.686294 | 5.727168  | 39.H                               | 1.820095  | 12.106303 | 0.088391  |

|      |          |           |          |      |          |           |          |
|------|----------|-----------|----------|------|----------|-----------|----------|
| 40.C | 2.199198 | 12.985147 | 2.283847 | 40.C | 2.784829 | 12.576395 | 4.383294 |
| 41.C | 1.621368 | 14.152381 | 1.778743 | 41.C | 2.735142 | 13.355848 | 5.541621 |
| 42.H | 1.378532 | 14.211964 | 0.719231 | 42.H | 3.127199 | 12.948038 | 6.471701 |
| 43.C | 1.348615 | 15.231105 | 2.634001 | 43.C | 2.179862 | 14.642927 | 5.501340 |
| 44.H | 0.897247 | 16.127314 | 2.208421 | 44.H | 2.156883 | 15.227829 | 6.420768 |
| 45.C | 1.619618 | 15.193247 | 3.990212 | 45.C | 1.660213 | 15.183831 | 4.340383 |
| 46.H | 1.383982 | 16.039479 | 4.631850 | 46.H | 1.228096 | 16.182175 | 4.332378 |
| 47.O | 2.469144 | 11.916701 | 1.574666 | 47.O | 3.277732 | 11.360569 | 4.361545 |
| 48.S | 4.256132 | 8.913710  | 3.858501 | 48.S | 4.201317 | 8.789438  | 3.756052 |
| 49.N | 3.349203 | 9.369906  | 1.079663 | 49.N | 3.281109 | 9.421447  | 1.036672 |
| 50.N | 5.105536 | 11.148358 | 1.946468 | 50.N | 5.050043 | 11.136490 | 2.011489 |
| 51.N | 1.580479 | 9.714993  | 2.984274 | 51.N | 1.576514 | 9.699566  | 3.008125 |
| 52.C | 6.209113 | 12.006485 | 4.001431 | 52.C | 6.138908 | 11.868456 | 4.131148 |
| 53.H | 5.883225 | 11.124659 | 4.554796 | 53.H | 5.663539 | 11.039308 | 4.652886 |
| 54.H | 5.571611 | 12.852255 | 4.273165 | 54.H | 5.610362 | 12.785244 | 4.413480 |
| 55.H | 7.229693 | 12.248130 | 4.306859 | 55.H | 7.173990 | 11.963607 | 4.468572 |

**Table S4.** Coordinates of optimized structure of  $[\mathbf{1s}]^+$  and  $[\mathbf{1s}_{\text{rev}}]^+$  with  $S = 0$  in methanol (COSMO) and its respective bond energies.

| $[\mathbf{1s}]^+$ E = -7717.66 kcal/mol |           |           |           | $[\mathbf{1s}_{\text{rev}}]^+$ E = -7711.76 kcal/mol |           |           |           |
|-----------------------------------------|-----------|-----------|-----------|------------------------------------------------------|-----------|-----------|-----------|
| 1.Co                                    | 3.281551  | 10.499477 | 2.621793  | 1.Co                                                 | 3.365927  | 10.377737 | 2.745372  |
| 2.C                                     | 3.891030  | 7.538448  | 2.679468  | 2.C                                                  | 3.857080  | 7.401503  | 2.314888  |
| 3.H                                     | 4.598583  | 6.721902  | 2.867654  | 3.H                                                  | 4.543692  | 6.547182  | 2.356621  |
| 4.H                                     | 2.880432  | 7.145594  | 2.835866  | 4.H                                                  | 2.837602  | 7.015040  | 2.424753  |
| 5.C                                     | 4.101034  | 8.062790  | 1.284370  | 5.C                                                  | 4.067111  | 8.140241  | 1.023935  |
| 6.H                                     | 5.160146  | 8.303309  | 1.157886  | 6.H                                                  | 5.130339  | 8.377174  | 0.929558  |
| 7.H                                     | 3.817360  | 7.339782  | 0.507709  | 7.H                                                  | 3.760929  | 7.565025  | 0.139292  |
| 8.C                                     | 4.043029  | 10.119406 | 0.000019  | 8.C                                                  | 4.049427  | 10.337807 | 0.054046  |
| 9.H                                     | 3.346774  | 10.854866 | -0.412224 | 9.H                                                  | 3.387786  | 11.138225 | -0.282557 |
| 10.H                                    | 4.381643  | 9.469796  | -0.814928 | 10.H                                                 | 4.363009  | 9.785422  | -0.839561 |
| 11.C                                    | 1.924541  | 9.073050  | 0.669395  | 11.C                                                 | 1.899154  | 9.241464  | 0.649686  |
| 12.H                                    | 1.841153  | 8.158557  | 0.072902  | 12.H                                                 | 1.783057  | 8.371607  | -0.005690 |
| 13.H                                    | 1.576916  | 9.906681  | 0.051568  | 13.H                                                 | 1.537427  | 10.103812 | 0.083100  |
| 14.C                                    | 5.177320  | 10.838891 | 0.651801  | 14.C                                                 | 5.221797  | 10.922189 | 0.780324  |
| 15.C                                    | 6.343674  | 11.201793 | -0.010139 | 15.C                                                 | 6.390152  | 11.334833 | 0.152770  |
| 16.H                                    | 6.473673  | 10.930021 | -1.055037 | 16.H                                                 | 6.491287  | 11.220740 | -0.923871 |
| 17.C                                    | 7.325414  | 11.901926 | 0.681429  | 17.C                                                 | 7.413598  | 11.880572 | 0.920380  |
| 18.H                                    | 8.246355  | 12.197861 | 0.182528  | 18.H                                                 | 8.337563  | 12.211138 | 0.449530  |
| 19.C                                    | 7.114880  | 12.199404 | 2.023236  | 19.C                                                 | 7.242361  | 11.976884 | 2.297019  |
| 20.H                                    | 7.855498  | 12.734205 | 2.613107  | 20.H                                                 | 8.019477  | 12.381347 | 2.941434  |
| 21.C                                    | 5.934227  | 11.792347 | 2.627175  | 21.C                                                 | 6.054999  | 11.534378 | 2.862163  |
| 22.H                                    | 5.748555  | 11.990396 | 3.676578  | 22.H                                                 | 5.880160  | 11.569968 | 3.932347  |
| 23.C                                    | 1.075728  | 9.013322  | 1.895260  | 23.C                                                 | 1.082145  | 9.090199  | 1.896049  |
| 24.C                                    | -0.147492 | 8.354099  | 1.943816  | 24.C                                                 | -0.170653 | 8.487609  | 1.914410  |
| 25.H                                    | -0.500811 | 7.813895  | 1.068571  | 25.H                                                 | -0.581851 | 8.073823  | 0.996538  |
| 26.C                                    | -0.890885 | 8.393383  | 3.116560  | 26.C                                                 | -0.870220 | 8.419262  | 3.113255  |
| 27.H                                    | -1.851474 | 7.885187  | 3.177533  | 27.H                                                 | -1.852186 | 7.951178  | 3.150239  |



|      |           |           |          |      |           |           |          |
|------|-----------|-----------|----------|------|-----------|-----------|----------|
| 28.C | -0.376381 | 9.078802  | 4.212476 | 28.C | -0.287021 | 8.942069  | 4.263536 |
| 29.H | -0.911841 | 9.129691  | 5.157540 | 29.H | -0.789217 | 8.899920  | 5.227187 |
| 30.C | 0.856286  | 9.703003  | 4.098843 | 30.C | 0.970075  | 9.520387  | 4.178182 |
| 31.H | 1.297203  | 10.225547 | 4.939528 | 31.H | 1.479701  | 9.922770  | 5.047234 |
| 32.C | 2.567887  | 12.938040 | 3.648442 | 32.C | 2.542346  | 12.971335 | 3.493414 |
| 33.C | 2.365560  | 14.048654 | 4.514138 | 33.C | 2.035052  | 14.300196 | 3.577154 |
| 34.C | 2.817983  | 13.906657 | 5.847153 | 34.C | 1.427434  | 14.825662 | 2.413897 |
| 35.H | 2.689078  | 14.726597 | 6.552647 | 35.H | 1.023702  | 15.837471 | 2.422104 |
| 36.C | 3.415914  | 12.731021 | 6.239664 | 36.C | 1.346667  | 14.043016 | 1.287538 |
| 37.H | 3.772816  | 12.588773 | 7.257238 | 37.H | 0.877425  | 14.403557 | 0.374850 |
| 38.C | 3.574607  | 11.680459 | 5.320130 | 38.C | 1.882639  | 12.743316 | 1.300904 |
| 39.H | 4.035944  | 10.744401 | 5.621069 | 39.H | 1.802875  | 12.143251 | 0.402604 |
| 40.C | 2.156010  | 12.950668 | 2.284190 | 40.C | 3.138198  | 12.340027 | 4.619972 |
| 41.C | 1.533558  | 14.110857 | 1.808042 | 41.C | 3.236527  | 13.062106 | 5.812718 |
| 42.H | 1.205600  | 14.152707 | 0.770252 | 42.H | 3.689589  | 12.591093 | 6.684102 |
| 43.C | 1.335459  | 15.206928 | 2.663567 | 43.C | 2.748336  | 14.376418 | 5.882921 |
| 44.H | 0.847954  | 16.095595 | 2.261067 | 44.H | 2.838843  | 14.914718 | 6.826907 |
| 45.C | 1.734149  | 15.199046 | 3.989722 | 45.C | 2.155250  | 14.999603 | 4.799467 |
| 46.H | 1.568339  | 16.062145 | 4.631482 | 46.H | 1.775475  | 16.016747 | 4.874857 |
| 47.O | 2.382472  | 11.881743 | 1.567442 | 47.O | 3.554769  | 11.102259 | 4.489233 |
| 48.S | 4.259039  | 8.892072  | 3.817713 | 48.S | 4.285707  | 8.552465  | 3.632392 |
| 49.N | 3.337255  | 9.336883  | 1.046925 | 49.N | 3.326336  | 9.454170  | 1.002082 |
| 50.N | 4.975379  | 11.136146 | 1.955018 | 50.N | 5.057804  | 11.031546 | 2.117821 |
| 51.N | 1.565144  | 9.686488  | 2.958067 | 51.N | 1.634565  | 9.606706  | 3.014265 |
| 52.N | 3.164841  | 11.777619 | 4.057335 | 52.N | 2.479926  | 12.209616 | 2.359961 |

**Table S5.** Coordinates of optimized structure of  $[2s]^+$  and  $[2s_{rev}]^+$  with  $S = 0$  in methanol (COSMO) and its respective bond energies.

| $[2s]^+$ E = -8091.55 kcal/mol |          |           |           | $[2s_{rev}]^+$ E = -8086.64 kcal/mol |          |           |           |
|--------------------------------|----------|-----------|-----------|--------------------------------------|----------|-----------|-----------|
| 1.Co                           | 3.309270 | 10.526650 | 2.660899  | 1.Co                                 | 3.279460 | 10.495889 | 2.701587  |
| 2.C                            | 3.909977 | 7.558311  | 2.699900  | 2.C                                  | 3.844644 | 7.501531  | 2.535654  |
| 3.H                            | 4.622151 | 6.745605  | 2.886939  | 3.H                                  | 4.554454 | 6.675637  | 2.666026  |
| 4.H                            | 2.900998 | 7.155080  | 2.840803  | 4.H                                  | 2.834163 | 7.094349  | 2.654599  |
| 5.C                            | 4.129790 | 8.099676  | 1.312893  | 5.C                                  | 4.064621 | 8.136853  | 1.192495  |
| 6.H                            | 5.186677 | 8.355051  | 1.199166  | 6.H                                  | 5.121884 | 8.398966  | 1.099841  |
| 7.H                            | 3.861477 | 7.381721  | 0.526004  | 7.H                                  | 3.795247 | 7.481511  | 0.352742  |
| 8.C                            | 4.020633 | 10.152126 | 0.026393  | 8.C                                  | 3.975945 | 10.235555 | 0.032361  |
| 9.H                            | 3.313291 | 10.893061 | -0.354194 | 9.H                                  | 3.286642 | 10.972723 | -0.380617 |
| 10.H                           | 4.322663 | 9.505708  | -0.805994 | 10.H                                 | 4.307550 | 9.613861  | -0.808412 |
| 11.C                           | 1.943469 | 9.086914  | 0.704757  | 11.C                                 | 1.870827 | 9.135244  | 0.696601  |
| 12.H                           | 1.871211 | 8.166252  | 0.116576  | 12.H                                 | 1.789960 | 8.210516  | 0.115371  |
| 13.H                           | 1.591628 | 9.910600  | 0.075811  | 13.H                                 | 1.495036 | 9.937978  | 0.056134  |
| 14.C                           | 5.191461 | 10.856371 | 0.620329  | 14.C                                 | 5.139007 | 10.924133 | 0.673787  |
| 15.C                           | 6.283053 | 11.187464 | -0.169277 | 15.C                                 | 6.230589 | 11.304999 | -0.091504 |
| 16.H                           | 6.287665 | 10.907600 | -1.219954 | 16.H                                 | 6.238276 | 11.093516 | -1.158066 |
| 17.C                           | 7.346857 | 11.861466 | 0.410403  | 17.C                                 | 7.295246 | 11.937734 | 0.533964  |
| 18.H                           | 8.219120 | 12.145524 | -0.175790 | 18.H                                 | 8.168028 | 12.258429 | -0.032225 |
| 19.C                           | 7.281026 | 12.132220 | 1.765937  | 19.C                                 | 7.232709 | 12.114024 | 1.904710  |
| 20.H                           | 8.105692 | 12.628976 | 2.271199  | 20.H                                 | 8.062123 | 12.568454 | 2.441413  |



|      |           |           |          |      |           |           |           |
|------|-----------|-----------|----------|------|-----------|-----------|-----------|
| 21.C | 6.166989  | 11.760892 | 2.527086 | 21.C | 6.116620  | 11.699513 | 2.641767  |
| 22.N | 3.072981  | 11.784413 | 4.114427 | 22.N | 2.349463  | 12.267975 | 2.110814  |
| 23.C | 1.092655  | 9.034165  | 1.923200 | 23.C | 1.042056  | 9.069433  | 1.937899  |
| 24.C | -0.128112 | 8.370011  | 1.967593 | 24.C | -0.191280 | 8.430920  | 1.999382  |
| 25.H | -0.471982 | 7.826125  | 1.090889 | 25.H | -0.577640 | 7.924455  | 1.117913  |
| 26.C | -0.878274 | 8.408136  | 3.134914 | 26.C | -0.901285 | 8.445595  | 3.193470  |
| 27.H | -1.836932 | 7.896136  | 3.193487 | 27.H | -1.868702 | 7.951865  | 3.264509  |
| 28.C | -0.368079 | 9.098103  | 4.229403 | 28.C | -0.344415 | 9.084524  | 4.297071  |
| 29.H | -0.904079 | 9.149432  | 5.174112 | 29.H | -0.852263 | 9.109277  | 5.258380  |
| 30.C | 0.861683  | 9.727683  | 4.118669 | 30.C | 0.894381  | 9.693678  | 4.170981  |
| 31.H | 1.289863  | 10.250363 | 4.964033 | 31.H | 1.384609  | 10.183934 | 5.004551  |
| 32.C | 2.502772  | 12.949518 | 3.682532 | 32.C | 2.277209  | 13.102030 | 3.191732  |
| 33.C | 2.198766  | 14.033034 | 4.553335 | 33.C | 1.698700  | 14.403675 | 3.147923  |
| 34.C | 2.491560  | 13.847612 | 5.924716 | 34.C | 1.169409  | 14.825317 | 1.907066  |
| 35.H | 2.277859  | 14.643614 | 6.637002 | 35.H | 0.718063  | 15.812653 | 1.815947  |
| 36.C | 3.031192  | 12.654040 | 6.346640 | 36.C | 1.220537  | 13.970482 | 0.832854  |
| 37.H | 3.255186  | 12.472636 | 7.395501 | 37.H | 0.812160  | 14.247108 | -0.136673 |
| 38.C | 3.310913  | 11.640010 | 5.415869 | 38.C | 1.813947  | 12.704150 | 0.976294  |
| 39.H | 3.737826  | 10.695108 | 5.738372 | 39.H | 1.830560  | 12.046979 | 0.115628  |
| 40.C | 2.202626  | 12.987043 | 2.290781 | 40.C | 2.798012  | 12.570501 | 4.403290  |
| 41.C | 1.623537  | 14.156222 | 1.783443 | 41.C | 2.745234  | 13.362643 | 5.554875  |
| 42.H | 1.382947  | 14.216102 | 0.722834 | 42.H | 3.135182  | 12.967038 | 6.491577  |
| 43.C | 1.346926  | 15.234358 | 2.640128 | 43.C | 2.190381  | 14.650643 | 5.498890  |
| 44.H | 0.894740  | 16.130738 | 2.214156 | 44.H | 2.165597  | 15.246071 | 6.412200  |
| 45.C | 1.615950  | 15.194810 | 3.997921 | 45.C | 1.673424  | 15.179069 | 4.329517  |
| 46.H | 1.378633  | 16.038830 | 4.642594 | 46.H | 1.240193  | 16.177257 | 4.306826  |
| 47.O | 2.472316  | 11.923273 | 1.582575 | 47.O | 3.288159  | 11.356299 | 4.387256  |
| 48.S | 4.256263  | 8.901659  | 3.857736 | 48.S | 4.207934  | 8.769736  | 3.762367  |
| 49.N | 3.352185  | 9.365562  | 1.084477 | 49.N | 3.285702  | 9.419228  | 1.050466  |
| 50.N | 5.103707  | 11.148879 | 1.942465 | 50.N | 5.050240  | 11.138616 | 2.011983  |
| 51.N | 1.578775  | 9.716498  | 2.981700 | 51.N | 1.566634  | 9.703119  | 3.007578  |
| 52.C | 6.196714  | 12.044459 | 3.990398 | 52.C | 6.150760  | 11.884771 | 4.122182  |
| 53.H | 5.857573  | 11.182099 | 4.565115 | 53.H | 5.686961  | 11.050729 | 4.646206  |
| 54.H | 5.567810  | 12.903543 | 4.240535 | 54.H | 5.620647  | 12.797446 | 4.413780  |
| 55.H | 7.218381  | 12.283373 | 4.293767 | 55.H | 7.189713  | 11.986310 | 4.445466  |

## References

1. Bickelhaupt, F. M.; Solà, M.; Fonseca Guerra, C. Structure and bonding of methyl alkali metal molecules. *J. Mol. Model.* **2006**, 12 (5), 563-568 DOI: 10.1007/s00894-005-0056-0.
2. Bickelhaupt, F. M.; Solà, M.; Fonseca Guerra, C. Table Salt and Other Alkali Metal Chloride Oligomers: Structure, Stability, and Bonding. *Inorg. Chem.* **2007**, 46 (13), 5411-5418 DOI: 10.1021/ic070328u.
3. Bickelhaupt, F. M.; Solà, M.; Guerra, C. F. Covalent versus ionic bonding in alkalimetal fluoride oligomers. *J. Comput. Chem.* **2007**, 28 (1), 238-250 DOI: 10.1002/jcc.20547.
